# Supplementary material for: Phenotypic and pharmacogenetic evaluation of patients with thiazide-induced hyponatremia
Source: J Clin Invest. 2017 Aug 7;127(9):3367–74. doi: 10.1172/JCI89812 (PMC5669583; doi:10.1172/JCI89812)
Supplement: Supplemental data [file jci-127-89812-s001.pdf]

## **Supplementary Materials**

| <b><u>Index</u></b>                                                                                        | <b>Page</b> |
|------------------------------------------------------------------------------------------------------------|-------------|
| <b><u>Supplementary Methods</u></b>                                                                        |             |
| Clinical recruitment                                                                                       | 3           |
| Phenotypic studies of blood and urine samples                                                              | 4           |
| Measurement of fractional uric acid clearance                                                              | 6           |
| Plasma ADH measurement                                                                                     | 6           |
| Measurement of urinary PGE <sub>2</sub> and PGE <sub>2</sub> Metabolite (PGE <sub>2</sub> M) concentration | 6           |
| Genetic studies                                                                                            | 7           |
| Genome Wide Association study                                                                              | 7           |
| Resequencing of GWAS candidate regions                                                                     | 7           |
| Kidney immunofluorescence                                                                                  | 9           |
| <b><u>Supplementary results</u></b>                                                                        |             |
| Phenotype of TIH cases and controls                                                                        | 10          |
| Results of genetic studies                                                                                 | 14          |
| Genome Wide Association Study of cohort 1 TIH cases and                                                    |             |
| Controls from the 1958 birth cohort                                                                        | 14          |
| Interrogation of GWAS candidate regions                                                                    | 21          |
| Human kidney immunofluorescence- PGT kidney expression                                                     | 26-31       |
| Urinary PGE <sub>2</sub> and PGE <sub>2</sub> Metabolite (PGE <sub>2</sub> M) concentration                | 30-31       |

## **Supplementary Tables**

|                        |    |
|------------------------|----|
| Supplementary Table S1 | 5  |
| Supplementary Table S2 | 11 |
| Supplementary Table S3 | 12 |
| Supplementary Table S4 | 13 |
| Supplementary Table S5 | 15 |
| Supplementary Table S6 | 17 |
| Supplementary Table S7 | 21 |
| Supplementary Table S8 | 22 |
| Supplementary Table S9 | 24 |
| Supplementary table 10 | 25 |
| Supplementary table 11 | 26 |

## **Supplementary Figures**

|                         |       |
|-------------------------|-------|
| Supplementary Figure S1 | 14    |
| Supplementary Figure S2 | 16    |
| Supplementary Figure S3 | 18    |
| Supplementary Figure S4 | 18-20 |
| Supplementary Figure S5 | 24    |
| Supplementary Figure S6 | 27-31 |
| Supplementary Figure S7 | 32    |

## **Supplementary methods**

### **Clinical recruitment**

Cohort 1; This study was conducted in line with the standards of ICH/Good Clinical Practise sections 8.2.8 and was given approval by the Queen's Medical Centre Ethics committee (study approval reference GM030208). Between July 2002 and November 2003 a daily search of the biochemistry data base of all patients admitted to the department of internal medicine at Nottingham University Hospitals NHS Trust, UK was undertaken to identify those patients with serum sodium <130mM (cases) and those with serum sodium concentration 135-145mM (controls). Inclusion criteria were to be a hospital inpatient aged sixteen to ninety years taking any thiazide or thiazide-like diuretic. For hyponatremic TIH cases on thiazides, the clinical diagnosis of thiazide-induced hyponatremia without any other cause of hyponatremia was necessary. Specifically those with cirrhosis, end stage heart failure, renal impairment (eGFR<30ml/min), nephrotic syndrome, pregnancy, syndrome of inappropriate anti-diuretic hormone secretion, untreated endocrine disease (hypothyroidism, hypopituitarism, Addison's disease), diarrhoea, vomiting, clinical dehydration, hyperlipidemia, hyperproteinemia, blood glucose>13.9mM, clofibrate, carbamazepine, chlorpropamide, anti-neoplastic drugs or any other cause of hyponatremia apart from a thiazide or thiazide-like diuretic evident to the treating clinician or research team were excluded. Patients read a study information sheet and informed consent was taken. Clinical biochemistry results were recorded from the hospital computer system and a single 8ml EDTA blood sample taken for DNA extraction.

Cohort 2; hypoantremic TIH cases on thiazides were identified in the same way as cohort 1 between April 2012 and August 2015 (UK national research ethics committee reference 11/EM/0233). Inclusion criteria were age 18-100 years with capacity to give informed consent, taking a thiazide or thiazide-related diuretic (except control group 2), blood sodium concentration of less than 130 mM for cases or sodium between 135 mM and 145 mM for

controls. Exclusion criteria for cases and controls were patients who lack capacity to consent, those who have an alternative medical cause (other than the thiazide) for their hyponatremia including but not limited to: cirrhosis or other liver failure, severe heart failure, severe renal failure (eGFR < 30 ml/ minute) or nephrotic syndrome, pregnancy, untreated endocrine diseases including but not limited to hypothyroidism, hypoadrenalism and hypopituitarism, Syndrome of Inappropriate Antidiuretic secretion (SIADH), hyperglycemia (glucose greater than 13.9 mM). After informed consent was obtained an 8ml EDTA blood sample taken for DNA, and an additional 11ml serum and 8ml plasma was also collected for phenotypic studies together with commencement of plain 24 hour urine collection and a single 20ml spot urine sample with protease inhibitor (cOMplete, Mini, EDTA-free®- Roche) so long as intravenous fluids had not been administered by the regular care team. Hyponatremic TIH cases were then assessed in the hypertension outpatient clinic after two months without thiazide and repeat blood and urine samples taken. Normonatremic thiazide and non-thiazide controls (serum sodium 135-145 mM) were identified by primary care surgeries in Nottinghamshire and matched as closely as possible to the cases for age, sex, comorbidities and polypharmacy.

#### *Phenotypic studies of blood and urine samples*

In cohort 2 serum, plasma and 24h urine were analysed for a range of physiological parameters by the biochemistry department at Nottingham University Hospitals NHS Trust using the same methods as for routine clinical care (Supplementary Table 1).

| Biochemistry parameter   | Method                                            | Machine                                |
|--------------------------|---------------------------------------------------|----------------------------------------|
| <i>Serum:</i>            |                                                   |                                        |
| <b>Sodium</b>            | Indirect ion selective electrode                  | Beckman AU clinical chemistry analyser |
| <b>Potassium</b>         | Indirect ion selective electrode                  | Beckman AU clinical chemistry analyser |
| <b>Urea</b>              | GLDH kinetic UV test method                       | Beckman AU clinical chemistry analyser |
| <b>Creatinine</b>        | IDMS-traceable kinetic colour test (Jaffe) method | Beckman AU clinical chemistry analyser |
| <b>Osmolarity</b>        | Freezing point depression                         | 3300 Micro-Osmometer                   |
| <b>TSH</b>               | Sandwich immunoassay                              | Siemens Advia Centaur                  |
| <b>Glucose</b>           | Hexokinase UV method                              | Beckman AU clinical chemistry analyser |
| <b>Chloride</b>          | Indirect ion selective electrode                  | Beckman AU clinical chemistry analyser |
| <b>corrected Calcium</b> | Arsenazo III Photometric colorimetric test method | Beckman AU clinical chemistry analyser |
| <b>Phosphate</b>         | Photometric UV test method                        | Beckman AU clinical chemistry analyser |
| <b>Magnesium</b>         | Colorimetric test method                          | Beckman AU clinical chemistry analyser |
| <b>Bicarbonate</b>       | Colorimetric enzymatic assay                      | Beckman AU clinical chemistry analyser |
| <b>Zinc</b>              | ICP-MS                                            | Agilent 7700x ICP-MS                   |
| <b>Vitamin D</b>         | Immunoassay                                       | Siemens Advia Centaur                  |
| <i>Plasma:</i>           |                                                   |                                        |
| <b>Renin</b>             | Chemiluminescent immunoassay                      | DiaSorin analyser                      |
| <b>Aldosterone</b>       | Chemiluminescent immunoassay                      | DiaSorin analyser                      |
| <b>PTH</b>               | Immunoassay                                       | Siemens Advia Centaur                  |
| <i>24h urine:</i>        |                                                   |                                        |
| <b>Sodium</b>            | Indirect ion selective electrode                  | Beckman AU clinical chemistry analyser |
| <b>Potassium</b>         | Indirect ion selective electrode                  | Beckman AU clinical chemistry analyser |
| <b>Urea</b>              | GLDH kinetic UV test method                       | Beckman AU clinical chemistry analyser |
| <b>Creatinine</b>        | IDMS-traceable kinetic colour test (Jaffe) method | Beckman AU clinical chemistry analyser |
| <b>Chloride</b>          | Indirect ion selective electrode                  | Beckman AU clinical chemistry analyser |
| <b>Calcium</b>           | Arsenazo III Photometric colorimetric test method | Beckman AU clinical chemistry analyser |
| <b>Phosphate</b>         | Photometric UV test method                        | Beckman AU clinical chemistry analyser |
| <b>Magnesium</b>         | Colorimetric test method                          | Beckman AU clinical chemistry analyser |

**Supplementary Table S1.** Parameters and methods of blood and urine analysis of TIH and control patients by Nottingham University Hospitals NHS Trust biochemistry department.

*Measurement of fractional uric acid clearance*

Serum and 24h urine samples were analysed for uric acid using the uric acid colorimetric kit (Bio Vision, USA). In brief, serum and urine samples were diluted in uric acid assay buffer. Reaction mix was added to samples and standards. Absorbance (OD) was measured using FlexStation® 3 Multi-Mode Microplate Reader (Molecular Devices Corporation, U.S.A.) at 570nm. Several dilutions were tested to ensure readings are within the standards range and the assay was carried in duplicates at room temperature. Creatinine clearance (Ccl) was calculated from the formula  $Ccl = Uv \times Ucr / Scr$ , expressed in ml/ min (where Uv is urine volume/24hrs, Ucr is urinary creatinine, and Scr is serum creatinine). Uric acid clearance (UAcl) was calculated from the formula  $UAcl = Uv \times Uua / Sua$ , expressed in ml/min (where Uua is urinary uric acid and Sua is serum uric acid concentration). Fractional uric acid clearance (FUAc) was calculated as  $FUAc = UAcl / Ccl \times 100$ , and expressed as a percentage.

*Plasma ADH measurement*

Plasma samples were analysed for ADH using the Arg8-vasopressin ELISA kit (Abcam, UK). In brief, plasma samples were diluted in assay buffer and assay was carried in duplicates at room temperature. Several dilutions were tested to ensure readings are within the standards range. Absorbance (OD) was measured using FlexStation® 3 Multi-Mode Microplate Reader (Molecular Devices Corporation, U.S.A.) at 405nm. Samples within 20-80% percentage bound were considered for further analysis, taking in to account appropriate dilution factors.

*Measurement of urinary PGE2 and PGE2 Metabolite (PGE2M) concentration*

Urinary PGE2 and PGE2M levels were measured at room temperature by a commercialized enzyme linked immunosorbent assay (Prostaglandin E2 and Prostaglandin E Metabolite EIA

kits, Cayman Chemical, UK). For PGE2 analysis, Standard (10 ng/ml) was used to produce a dilution series (2500 pg/ml set as highest standard). For PGE2M analysis, Standard (1000 pg/ml) was used to produce a dilution series (50 pg/ml set as highest standard). The microplate was prepared with calibrators, standards and sample according to manufacturer's instructions. The optical density of each well was determined within 10 minutes, using a FlexStation® 3 Multi-Mode Microplate Reader (Molecular Devices Corporation, U.S.A.) at 420 nm. Several dilutions were tested to ensure readings are within the standards range and each sample was carried out in duplicate. Samples within 20-80% percentage bound were considered for further analysis and data was normalized using urinary creatinine and 24h urine volume.

### **Genetic studies**

#### *Genome Wide Association Study*

Quality control of the genotype data was carried out separately in the case and control datasets. Individuals with >5% missing genotype data were excluded. SNPs were excluded if they had more than 5% data missing, had a minor allele frequency (MAF) less than 1%, or if they significantly deviated from Hardy Weinberg Equilibrium (HWE) at the  $P=0.001$  level. A/T and C/G SNPs were additionally excluded due to strand assignment issues, along with SNPs which were identified as having differential missingness in cases and controls (number of missing genotypes significantly differed in cases and controls at the  $P=0.01$  level). Association testing was carried out using Plink v 1.07, using a logistic regression model, with adjustment for 10 principal components and assuming an additive genetic model. Post-association testing, cluster plots were generated for all SNPs found to be significant at the  $P<1.0\times 10^{-5}$  level, and checked for incorrect genotype calling.

#### *Resequencing of GWAS candidate regions*

Tiled PCR amplicons were prepared to cover all exons and splice junctions from genomic DNA using a microfluidic PCR system (Fluidigm Access Array) followed by sequencing on the Illumina HiSeq. Reads were aligned using bwa (v0.7.5a-r416), and GATK (v2.8-1) was

used for base recalibration, local realignment, and multi-sample variant calling using Unified Genotyper, according to best practice guidelines. GATK variant filter parameters used for sequencing were: (a) for SOLiD data: SNPs:DP < 4, GQ < 5, FS > 60.0, MQ < 40.0, MQRankSum < -12.5, QD < 2.0, ReadPosRankSum < -8.0 Indels: DP<4, GQ<5, QD < 2.0, ReadPosRankSum < -20.0, InbreedingCoeff < -0.8, FS>200.0. (b) for Illumina data: SNPs: DP<4, GQ<5, QD < 3.0, MQ < 30.0 Indel: DP<4, GQ<5, QD < 3.0. Variants were annotated using SnpEff (v3.3; using ensembl canonical transcripts vGRCh37.73), and SnpSift (v3.3h; using dbSNPv138 and dbNSFPv2.0). All samples passed quality control metrics and were included in analyses. Variants with missing genotypes in more than 5 samples, or deviating from HWE in controls were removed.

Association tests were performed using PLINK/SEQ (v0.08-x86\_64). To identify coding variation underlying the suggestive GWAS associations, for each candidate gene, the coding SNP with the strongest association was identified. Fisher's exact test was used to perform allelic single variant tests on protein-altering variants with a combined allele count of at least 7 across the population (an allele count powered to give a nominal p-value < 0.005 if all variant alleles were restricted to cases). Gene-wise burdens of protein-altering variation were also assessed both by collapsing rare variants (MAF < 0.01 and then to MAF < 0.001), and by applying c-alpha to all variants.

#### *Replication of rs34550074 (p.A396T) in cohort 2 TIH cases and controls*

94 TIH cases and 106 normonatremic thiazide controls underwent Sanger sequencing at rs34550074 (p.A396T). A case-control association analysis was undertaken using a Fisher's Exact Test (allelic model), The results for both the Cohort 1 and Cohort 2 TIH cases normonatremic thiazide controls were combined using a Cochran-Mantel-Haenszel meta-analysis to give an overall estimated effect.

Reads were aligned and variants identified and annotated using the pipeline described above for GWAS loci resequencing, but with specific parameters appropriate for the target enrichment and sequencing platform. (GATK variant filters - SNPs: DP < 4, GQ < 5, FS > 60.0, MQ < 40.0, MQRankSum < -12.5, QD < 2.0, ReadPosRankSum < -8.0 Indels: DP<4, GQ<5, QD < 2.0, ReadPosRankSum < -20.0, InbreedingCoeff < -0.8, FS>200.0). Variants with missing genotypes in more than 5 samples or that deviated from HWE in controls were removed as before. Three samples with poor sequencing coverage were excluded from analyses.

Fisher's exact test was used to perform additive single variant tests on protein-altering variants with a combined allele count of at least 8 across the population (an allele count powered to give a nominal p-value < 0.005 if variant alleles restricted to cases). Gene-wise burdens of protein-altering variation were assessed both by collapsing rare variants (MAF < 0.01 or 0.001), and by applying c-alpha to all variants.

### *Kidney Immunofluorescence*

Formalin-fixed paraffin embedded human tissue sections were obtained from the Cambridge Human Research Tissue Bank. 5 µm sections were deparaffinised in Histoclear (National Diagnostics) and rehydrated in graded methanol steps. An antigen retrieval step was performed with R-Universal buffer in the 2100 antigen retriever for a single heat-pressure cycle (Aptum Biologics). Sections were permeabilized with 0.05% v/v Triton-X100-PBS for 20 mins and blocked for 1 h at 37 °C with 2% v/v donkey serum in 0.05% v/v Triton-X100-PBS. Primary antibodies were incubated overnight for 16 h at 4 °C at the following concentrations diluted in 1% v/v donkey serum in 0.05% v/v Triton-X100-PBS: 2 µg/mL rabbit anti-PGT (11860; Cayman Chemical), sheep anti-NCC (S965B, MRC-PPU Reagents), sheep anti-NKCC2 antibody (S838B, MRC-PPU Reagents); 1:100 mouse anti-AQP1 (ab9566; Abcam); 1:2000 goat anti-AQP2 (sc-9882; Santa Cruz Biotechnology). Slides were then washed for 20 mins in 0.05% v/v Triton-X100-PBS and incubated in secondary antibody

for 1 h at 37 °C. Pre-absorbed donkey IgG conjugated Alexa Fluor 488, 555, 633 and 647 secondary antibodies (Life Technologies/Abcam) were used at 1:200 diluted in 1% v/v donkey serum in 0.05% v/v Triton-X100-PBS for immunofluorescent labelling. Slides were washed as above, followed by a 5 mins wash in distilled water before counterstaining of nuclei with 1:1000 Sytox Blue (S34857, Life Technologies) for 30 mins at room temperature and again washed for 5 mins in distilled water. Finally slides were mounted using Prolong gold antifade (P36930, Life Technologies) and shielded from light until imaging.

Immunofluorescent images were acquired on the Leica TCS SP2 laser-scanning confocal with 458nm, 488 nm, 543 nm, 633 nm laser lines mounted on an upright Leica DM RXA fluorescent microscope using either a HC PL FLUOTAR 10X/0.3NA or HC PL FLUOTAR 20X/0.5NA dry objective. Acquisition parameters: 8-bit, 1024x1024 pixels, between 1 – 3X digital zoom, 400 Hz scan speed, 4-line Kalman filtering, sequential (by line) channel imaging, 10 slice z-stack of 5µm. In FIJI image analysis software (fiji.sc/Fiji), fluorescent z-stacks underwent background subtraction (1000 pixel radius rolling ball, no smoothing) and average intensity z-projection. Image brightness and contrast were uniformly adjusted for each individual image by linear histogram stretching to enhance visibility.

### **Supplementary Results**

#### **Phenotype of TIH cases and controls**

|                                                     | Cohort 1                                         |                                            | Cohort 2                                           |                                                      |                                             |                                                   |
|-----------------------------------------------------|--------------------------------------------------|--------------------------------------------|----------------------------------------------------|------------------------------------------------------|---------------------------------------------|---------------------------------------------------|
|                                                     | Hyponatremic<br>TIH cases on<br>thiazide<br>n=48 | Normonatremic<br>thiazide controls<br>n=80 | Hyponatremic<br>TIH cases on<br>thiazides<br>n=109 | Normonatremic<br>TIH cases off<br>thiazides<br>n=109 | Normonatremic<br>thiazide controls<br>n=106 | Normonatremic<br>non-thiazide<br>controls<br>n=60 |
| S.Sodium mM                                         | 118 +/-0.9                                       | 139 +/-0.3****                             | 122+/-0.6                                          | 137+/-0.4††††                                        | 139 +/-0.2††††                              | 139+/-0.3                                         |
| S.Potassium mM                                      | 3.7 +/-0.09                                      | 4.0 +/-0.06 **                             | 3.7 +/-0.06                                        | 4.4+/-0.05††††                                       | 3.9+/-0.03                                  | 4.1+/-0.07§                                       |
| S. Urea mM                                          | 6.0 +/-0.4                                       | 7.7 +/-0.3                                 | 7.7 +/-0.6                                         | 6.3+/-0.3                                            | 6.5+/-0.2                                   | 7.6+/-1.5                                         |
| S. Creatinine µM                                    | 79 +/-5                                          | 94 +/-4*                                   | 80 +/-3                                            | 74+/-2                                               | 82+/-2                                      | 80+/-3                                            |
| S.Osmolarity mosmol/Kg                              | 248 +/-2                                         | 289+/-1****                                | 255 +/-4                                           | 288+/-1††††                                          | 295+/-1††††                                 | 293+/-1                                           |
| eGFR ml/min                                         |                                                  |                                            | 75+/-2                                             | 73+/-2                                               | 68+/-1                                      | 73+/-2                                            |
| TSH mU/L                                            |                                                  |                                            | 2.1+/-0.3                                          | 2.7+/-0.3                                            | 2.5+/-0.2                                   | 2.1+/-0.2                                         |
| Glucose mM                                          | 6.8+/-0.3                                        | 6.6+/-0.2                                  | 7.6+/-0.4                                          | 5.9+/-0.2††                                          | 6.1+/-0.2††                                 | 6.5+/-0.4                                         |
| S. Chloride mM                                      |                                                  |                                            | 89+/-0.9                                           | 99+/-0.4††††                                         | 100+/-0.3††††                               | 102+/-0.5§§                                       |
| S. corrected Calcium mM                             |                                                  |                                            | 2.34+/-0.02                                        | 2.39+/-0.01                                          | 2.41+/-0.01††                               | 2.31+/-0.02§§                                     |
| S. Phosphate                                        |                                                  |                                            | 1.02 +/-0.03                                       | 1.17+/-0.02††††                                      | 1.08+/-0.02                                 | 1.06+/-0.04§§                                     |
| S. Magnesium mM                                     |                                                  |                                            | 0.75+/-0.02                                        | 0.81+/-0.01††                                        | 0.80+/-0.01†                                | 0.84+/-0.01                                       |
| S. Bicarbonate mM                                   |                                                  |                                            | 26.4+/-0.6                                         | 28.0+/-0.4                                           | 26.8+/-0.3                                  | 26.7+/-0.5                                        |
| S. Zinc µM                                          |                                                  |                                            | 9.4+/-0.3                                          | 10.6+/-0.2                                           | 12.6+/-0.3††††                              | 12.3+/-0.2§§                                      |
| P. Renin mU/L                                       |                                                  |                                            | 133+/-34                                           | 69+/-20                                              | 86+/-14                                     | 57+/-18                                           |
| P. Renin mU/L excluding<br>those taking a β blocker |                                                  |                                            | 148+/-43                                           | 83+/-25                                              | 92+/-17                                     | 74+/-26                                           |
| P. Aldosterone pM                                   |                                                  |                                            | 328+/-45                                           | 255+/-20                                             | 346+/-21                                    | 293+/-29                                          |
| S. Vitamin D nM                                     |                                                  |                                            | 34+/-3                                             | 38+/-2                                               | 45+/-2*                                     | 33+/-4                                            |
| P. PTH ng/L                                         |                                                  |                                            | 49+/-4                                             | 64+/-4                                               | 54+/-2                                      | 72+/-6                                            |
| Systolic BP mmHg                                    |                                                  |                                            | 139 +/-2.7                                         | 157+/-2.7††††                                        | 152+/-1.9††††                               | 147 +/- 3.5                                       |
| Diastolic BP mmHg                                   |                                                  |                                            | 72 +/-1.1                                          | 80 +/-1.3††††                                        | 82+/-1.1††††                                | 82+/-1.8                                          |
| BMI (Kg m <sup>-2</sup> )                           |                                                  |                                            | 25.7+/-0.6                                         | 25.4+/-0.5                                           | 24.1+/-0.5                                  | 27.2+/-0.6                                        |
| Weight (Kg)                                         |                                                  |                                            | 66.3+/-1.7                                         | 65.5+/-2.1                                           | 81.1+/-1.7††††                              | 79.0+/-2.4§§§                                     |

**Supplementary table S2** – Phenotype of TIH cases and controls in cohorts 1 and 2. ‘S.’ (Serum), ‘P.’ (Plasma), estimated Glomerular Filtration Rate (eGFR), Thyroid Stimulating Hormone (TSH), ParaThyroid Hormone (PTH), Body Mass Index (BMI). Comparisons are by 1 way ANOVA with Bonferroni correction. \* cohort 1 hyponatremic TIH cases on thiazides vs cohort 1 normonatremic thiazide controls: \*p<0.05, \*\* p < 0.005 \*\*\*p<10<sup>-4</sup>, \*\*\*\*p<10<sup>-5</sup>. † cohort 2 hyponatremic TIH cases on thiazides vs cohort 2 normonatremic TIH cases off thiazides: † p<0.05, †† p < 0.005 †††p<10<sup>-4</sup>, ††††p<10<sup>-5</sup>. †† cohort 2 hyponatremic TIH cases on thiazides vs cohort 2 normonatremic thiazide controls: †† p<0.05, ††† p < 0.005 ††††p<10<sup>-4</sup>, †††††p<10<sup>-5</sup>. § cohort 2 normonatremic non-thiazide controls vs cohort 2 normonatremic TIH cases off thiazides: § p<0.05, §§ p < 0.005 §§§p<10<sup>-4</sup>, §§§§p<10<sup>-5</sup>.

| Biochemistry<br>Characteristic | Cohort 1                                      |                                            | Cohort 2 cases                                  |                                                   | Cohort 2 controls                           |                                                 |
|--------------------------------|-----------------------------------------------|--------------------------------------------|-------------------------------------------------|---------------------------------------------------|---------------------------------------------|-------------------------------------------------|
|                                | Hyponatremic TIH<br>cases on thiazide<br>n=48 | Normonatremic<br>thiazide controls<br>n=80 | Hyponatremic TIH<br>cases on thiazides<br>n=109 | Normonatremic TIH<br>cases off thiazides<br>n=109 | Normonatremic<br>thiazide controls<br>n=106 | Normonatremic non-<br>thiazide controls<br>n=60 |
| Spot U.Osmolarity mosmol/Kg    | 465                                           | -                                          | 366+/-                                          | -                                                 |                                             |                                                 |
| Spot U. Sodium mM              | 23                                            | -                                          | 31+/-                                           | -                                                 |                                             |                                                 |
| Spot U. Potassium mM           | -                                             | -                                          | 39 +/-                                          | -                                                 |                                             |                                                 |
| 24h volume ml                  |                                               |                                            | 1305+/-167                                      | 1571+/-72                                         | 1671 +/-42 <sup>¶</sup>                     | 1700+/-72                                       |
| 24h urine osmolarity mosmol/Kg |                                               |                                            | 352+/-23                                        | 351+/-14                                          | 438 +/-15 <sup>¶</sup>                      | 415+/-22                                        |
| 24h urine creatinine mM        |                                               |                                            | 5+/-0.6                                         | 5+/-0.2                                           | 7+/-0.4                                     | 6+/-0.4                                         |
| 24h urine creatinine mmoles    |                                               |                                            | 5+/-0.5                                         | 6+/-0.4                                           | 10+/-0.4 <sup>¶¶¶¶</sup>                    | 10+/-0.4 <sup>§§§§</sup>                        |
| 24h urine sodium mM            |                                               |                                            | 39 +/-4                                         | 55+/-3 <sup>†</sup>                               | 67 +/-3 <sup>¶¶¶¶</sup>                     | 59+/-3                                          |
| 24h urine sodium mmoles        |                                               |                                            | 47+/-6                                          | 80+/-5 <sup>††</sup>                              | 109 +/-5 <sup>¶¶¶¶</sup>                    | 98+/-7                                          |
| 24h urine sodium/creatinine    |                                               |                                            | 10 +/-1                                         | 13+/-1 <sup>†</sup>                               | 11+/-0                                      | 10+/-1 <sup>§</sup>                             |
| 24h urine potassium mM         |                                               |                                            | 29+/-3                                          | 34+/-1                                            | 47+/-1 <sup>¶¶¶¶</sup>                      | 44+/-2 <sup>§§</sup>                            |
| 24h urine potassium mmoles     |                                               |                                            | 30+/-3                                          | 50+/-2 <sup>††††</sup>                            | 74+/-2 <sup>¶¶¶¶</sup>                      | 72+/-4 <sup>§§§§</sup>                          |
| 24h urine potassium/creatinine |                                               |                                            | 6+/-1                                           | 8+/-0 <sup>††</sup>                               | 8+/-0 <sup>¶¶</sup>                         | 8+/-0                                           |
| 24h urine urea mM              |                                               |                                            | 165+/-13                                        | 147+/-8                                           | 200+/-7                                     | 200+/-12 <sup>§§</sup>                          |
| 24h urine urea mmoles          |                                               |                                            | 170+/-15                                        | 206+/-10                                          | 319+/-10 <sup>¶¶¶¶</sup>                    | 309+/-15 <sup>§§§§</sup>                        |
| 24h urine urea/creatinine      |                                               |                                            | 34+/-2                                          | 34+/-1                                            | 32+/-1                                      | 29+/-2                                          |
| 24h urine chloride mM          |                                               |                                            | 40+/-4                                          | 59+/-3 <sup>††</sup>                              | 71+/-3 <sup>¶¶¶¶</sup>                      | 65+/-4                                          |
| 24h urine chloride mmoles      |                                               |                                            | 46+/-6                                          | 88+/-6 <sup>†††</sup>                             | 114+/-5 <sup>¶¶¶¶</sup>                     | 107+/-7                                         |
| 24h urine chloride/creatinine  |                                               |                                            | 10+/-1                                          | 14+/-1 <sup>††</sup>                              | 12+/-0                                      | 11+/-1 <sup>§</sup>                             |
| 24h urine calcium mM           |                                               |                                            | 1.74+/-0.21                                     | 1.83+/-0.15                                       | 1.89+/-0.13                                 | 2.19+/-0.24                                     |
| 24h urine calcium mmoles       |                                               |                                            | 2.03+/-0.32                                     | 2.56+/-0.22                                       | 3.01+/-0.20                                 | 3.68+/-0.45 <sup>§</sup>                        |
| 24h urine calcium/creatinine   |                                               |                                            | 0.38+/-0.53                                     | 0.42+/-0.03                                       | 0.31+/-0.02                                 | 0.37+/-0.05                                     |
| 24h urine magnesium mM         |                                               |                                            | 1.24+/-0.16                                     | 1.68+/-0.11                                       | 2.25+/-0.10 <sup>¶¶¶¶</sup>                 | 2.22+/-0.17 <sup>§</sup>                        |
| 24h urine magnesium mmoles     |                                               |                                            | 1.46+/-0.24                                     | 2.39+/-0.15 <sup>†</sup>                          | 3.60+/-0.15 <sup>¶¶¶¶</sup>                 | 3.58+/-0.24 <sup>§§§</sup>                      |
| 24h urine magnesium/creatinine |                                               |                                            | 0.32+/-0.04                                     | 0.39+/-0.02                                       | 0.38+/-0.01                                 | 0.38+/-0.02                                     |
| 24h urine phosphate mM         |                                               |                                            | 8.0+/-1.1                                       | 10.5+/-0.6                                        | 14.1+/-0.5 <sup>¶¶¶¶</sup>                  | 14.4+/-0.8 <sup>§§</sup>                        |
| 24h urine phosphate mmoles     |                                               |                                            | 8.4+/-1.2                                       | 15.3+/-0.9 <sup>†††</sup>                         | 22.8+/-0.8 <sup>¶¶¶¶</sup>                  | 23.1+/-1.1 <sup>§§§§</sup>                      |
| 24h urine phosphate/creatinine |                                               |                                            | 1.50+/-0.16                                     | 2.39+/-0.08 <sup>††††</sup>                       | 2.36+/-0.08 <sup>¶¶¶¶</sup>                 | 2.45+/-0.08                                     |
| 24h urine zinc µM              |                                               |                                            | 8.1+/-1.1                                       | 3.7+/-0.3 <sup>††††</sup>                         | 5.2+/-0.4 <sup>¶¶</sup>                     | 4.8+/-0.7                                       |
| 24h urine zinc µmoles          |                                               |                                            | 8.2+/-1.1                                       | 5.6+/-0.5                                         | 8.3+/-0.6                                   | 7.6+/-0.9                                       |
| 24h urine zinc/creatinine      |                                               |                                            | 1.52+/-0.16                                     | 1.01+/-0.15                                       | 0.87+/-0.09                                 | 0.75+/-0.06                                     |
| Free water reabsorption ml/min |                                               |                                            | 0.34+/-0.01                                     | 0.23+/-0.01                                       | 0.51+/-0.05                                 | 0.47+/-0.02 <sup>§§</sup>                       |

**Supplementary table S3.** Description of urinary phenotype of TIH cases and controls in cohorts 1 and 2. 1 way ANOVA with Bonferroni correction. \* cohort 1 hyponatremic TIH cases on thiazides vs cohort 1 normonatremic thiazide controls: \* $p < 0.05$ , \*\*  $p < 0.005$  \*\*\* $p < 10^{-4}$ , \*\*\*\* $p < 10^{-5}$ . † cohort 2 hyponatremic TIH cases on thiazides vs cohort 2 normonatremic TIH cases off thiazides: †  $p < 0.05$ , ††  $p < 0.005$  ††† $p < 10^{-4}$ , †††† $p < 10^{-5}$ . ¶ cohort 2 hyponatremic TIH cases on thiazides vs cohort 2 normonatremic thiazide controls: ¶  $p < 0.05$ , ¶¶  $p < 0.005$  ¶¶¶ $p < 10^{-4}$ , ¶¶¶¶ $p < 10^{-5}$ . § cohort 2 normonatremic non-thiazide controls vs cohort 2 normonatremic TIH cases off thiazides: §  $p < 0.05$ , §§  $p < 0.005$  §§§ $p < 10^{-4}$ , §§§§ $p < 10^{-5}$ . Solute free water reabsorption ( $T_{H_2O}^c$ ) = [urine flow rate]/[(Uosm/Posm) - 1] in ml/min.

| Biochemistry<br>Characteristic | Cohort 2 cases                            |                                             | Cohort 2 controls                  |                                           |
|--------------------------------|-------------------------------------------|---------------------------------------------|------------------------------------|-------------------------------------------|
|                                | Hyponatremic<br>TIH cases on<br>thiazides | Normonatremic<br>TIH cases off<br>thiazides | Normonatremic<br>thiazide controls | Normonatremic<br>non-thiazide<br>controls |
| Sodium %                       | 0.58+/-0.09                               | 0.72+/-0.04                                 | 0.65+/-0.03                        | 0.59+/-0.04                               |
| Potassium %                    | 11.1+/-1.1                                | 13.8+/-0.6                                  | 16.3+/-0.5¶¶¶¶                     | 14.7+/-0.6                                |
| Chloride %                     | 0.79+/-0.12                               | 1.10+/-0.08†                                | 0.95+/-0.04                        | 0.88+/-0.05                               |
| Calcium %                      | 1.08+/-0.13                               | 1.26+/-0.09                                 | 1.01+/-0.06                        | 1.26+/-0.13                               |
| Phosphate %                    | 10.8+/-1.2                                | 15.2+/-0.7†                                 | 18.0+/-0.8¶¶¶¶¶                    | 19.2+/-1.2*                               |
| Magnesium %                    | 3.05+/-0.44                               | 3.49+/-0.17                                 | 3.74+/-0.15                        | 3.49+/-0.18                               |
| Zinc %                         | 1.23+/-0.14                               | 0.60+/-0.04††††                             | 0.55+/-0.05¶¶¶¶¶                   | 0.49+/-0.04                               |

**Supplementary table S4.** Fractional urinary excretion of electrolytes of TIH cases and controls in cohort 2. TIH cases n=109, thiazide controls n=106, non-thiazide controls n=60. † cohort 2 hyponatremic TIH cases on thiazides vs cohort 2 normonatremic TIH cases off thiazides. 1 way ANOVA with Bonferroni correction: †  $p < 0.05$ , ††  $p < 0.005$  ††† $p < 10^{-4}$ , †††† $p < 10^{-5}$ . ¶ cohort 2 hyponatremic TIH cases on thiazides vs cohort 2 normonatremic thiazide controls: ¶  $p < 0.05$ , ¶¶  $p < 0.005$  ¶¶¶ $p < 10^{-4}$ , ¶¶¶¶ $p < 10^{-5}$ . § cohort 2 normonatremic non-thiazide controls vs cohort 2 normonatremic TIH cases off thiazides: §  $p < 0.05$ , §§  $p < 0.005$  §§§ $p < 10^{-4}$ , §§§§ $p < 10^{-5}$

Supplementary Figure S1 details serum and urinary uric acid concentrations in cohort 2 patients.

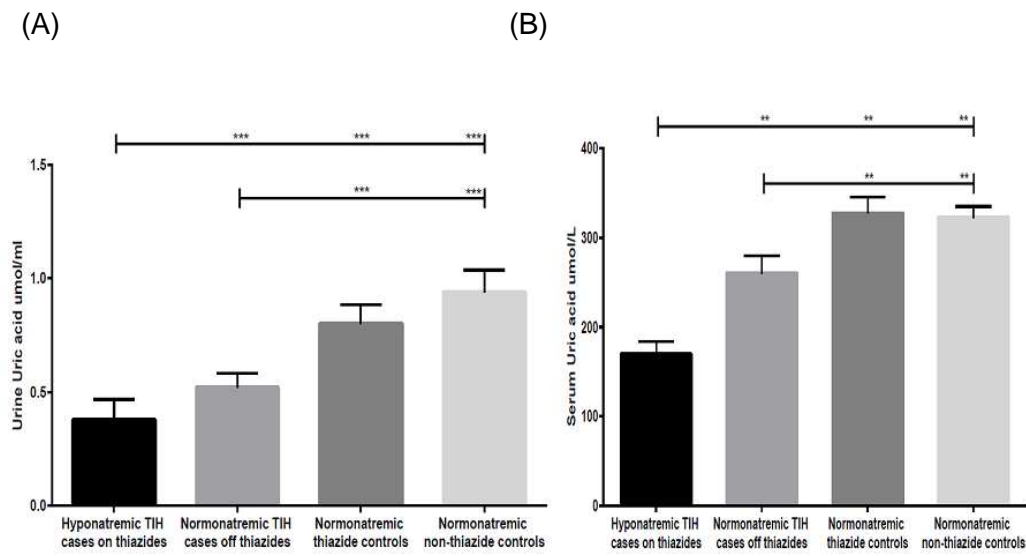

**Supplementary figure S1.** Serum and urinary uric acid concentration in cohort 2 TIH cases and controls. (A) Urinary uric acid concentration, (B) Serum uric acid concentration. n=20 in each group. 1 way ANOVA with Bonferroni correction. Data represented as mean±SEM. \*\*p < 0.01, \*\*\*p < 0.001.

### Results of genetic studies

#### *Genome Wide Association Study of 48 cases in first TIH cohort vs controls from 1958 birth cohort.*

Data were available for a total of 1,043,142 SNPs from 48 cohort 1 TIH cases on thiazides and for 1,157,986 SNPs from 2922 controls from the 1958 birth cohort. Exclusions were carried out separately in the case and control datasets. Individuals were excluded if more than 5% of their genotype data was missing. SNPs were excluded if they had more than 5% data missing, had a minor allele frequency (MAF) less than 1%, or if they significantly deviated from Hardy Weinberg Equilibrium (HWE) at the P=0.001 level. The number of individuals/SNPs which did not meet these criteria are summarised in Supplementary Table S5, by case-control status. After exclusions, 818,463 SNPs from 48 cases and 944,677

SNPs from 2905 controls remained, with 506,674 SNPs common to both cases and controls. The case and control genotype data was combined, and a second stage of exclusions were made: 1040 A/T SNPs and 1774 C/G SNPs were removed due to strand assignment issues, along with 1197 SNPs which were identified as having differential missingness in cases and controls (number of missing genotypes significantly differed in cases and controls at the  $P=0.01$  level, Supplementary table 5).

|                           |                                                       | <b>Cohort 1<br/>hyponatremic TIH<br/>cases on thiazides</b> | <b>1958 birth cohort<br/>controls</b> |
|---------------------------|-------------------------------------------------------|-------------------------------------------------------------|---------------------------------------|
|                           | Total Individuals, n                                  | 48                                                          | 2922                                  |
| <b>Sample<br/>QC</b>      | Individuals with >5% missing genotypes, n(%)          | 0(0%)                                                       | 17 (0.6%)                             |
|                           | Individuals passing QC                                | 48                                                          | 2905                                  |
|                           | Total SNPs, n                                         | 1,043,142                                                   | 1,157,986                             |
| <b>Stage 1<br/>SNP QC</b> | SNPs with >5% missing data, n(%)                      | 36,092 (3.5%)                                               | 7470 (0.6%)                           |
|                           | SNPs with <1% MAF, n(%)                               | 219,921 (21.1%)                                             | 194,387 (16.8%)                       |
|                           | SNPs deviating from HWE at $P=0.001$ , n(%)           | 771 (0.1%)                                                  | 18,968 (1.6%)                         |
|                           | SNPs passing stage 1 QC                               | 818,463                                                     | 944,677                               |
|                           | SNPs common in cases & controls                       | 506,674                                                     |                                       |
| <b>Stage 2<br/>SNP QC</b> | A/T and C/G SNPs, n(%)                                | 2814 (0.6%)                                                 |                                       |
|                           | SNPs with differential missingness ( $P=0.01$ ), n(%) | 1197 (0.2%)                                                 |                                       |
|                           | SNPs passing stage 2 QC                               | 502,633                                                     |                                       |

**Supplementary table S5.** Sample and SNP data Quality Control (QC)

Association Analysis: After quality control filters were applied, 502,663 SNPs from 48 cases and 2905 controls, remained for association testing. The analysis gave an inflation factor of  $\lambda=1.007$  and the resultant QQ plot (Supplementary Figure S2) showed that the distribution of observed P values was fairly close to what was expected. In total, 17 SNPs within 14 regions were identified as showing association with TIH ( $P<1.0 \times 10^{-5}$ ).

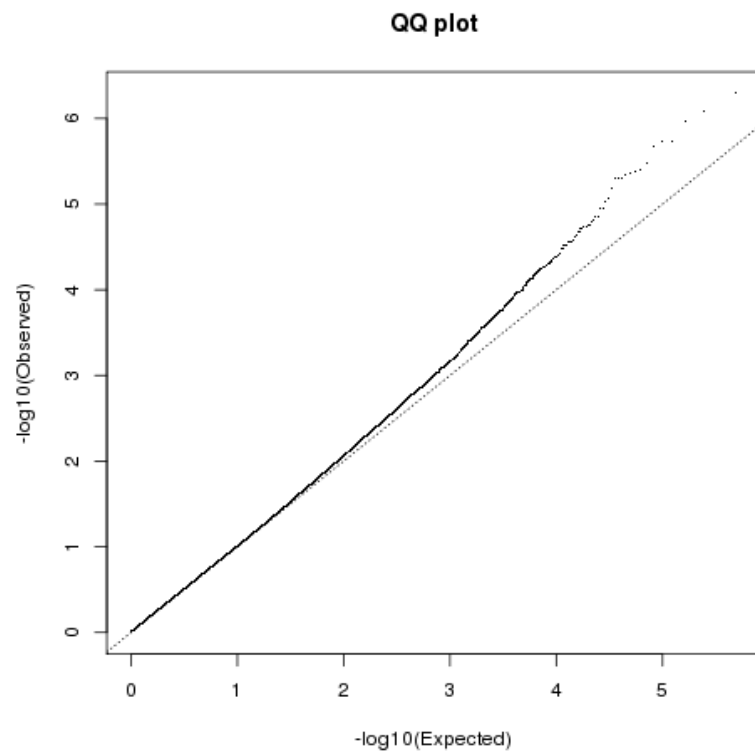

**Supplementary figure S2.** Expected vs Observed  $-\log_{10}$  (P-values)

| SNP        | Chr | Position  | Minor /<br>Major<br>Allele | MAF<br>Cases | MAF<br>Controls | OR (95% CI)           | P-Value               | Nearest<br>gene  |
|------------|-----|-----------|----------------------------|--------------|-----------------|-----------------------|-----------------------|------------------|
| rs7341607  | 8   | 120667532 | A/G                        | 0.073        | 0.013           | 6.09 (2.73,<br>13.58) | $5.11 \times 10^{-7}$ | ENPP2            |
| rs2196379  | 4   | 175320991 | C/A                        | 0.146        | 0.042           | 3.89 (2.18,<br>6.96)  | $8.06 \times 10^{-7}$ | FBXO8,<br>CEP44  |
| rs17175174 | 12  | 47571901  | A/G                        | 0.208        | 0.075           | 3.26 (1.98,<br>5.39)  | $1.06 \times 10^{-6}$ | CCDC65,<br>RND1  |
| rs2271171  | 4   | 134295603 | G/A                        | 0.073        | 0.014           | 5.63 (2.53,<br>12.53) | $1.87 \times 10^{-6}$ | PCDH10           |
| rs16970325 | 15  | 38160423  | A/G                        | 0.240        | 0.095           | 3.00(1.87,<br>4.84)   | $2.10 \times 10^{-6}$ | BCI2BMF          |
| rs6796067  | 3   | 62864149  | G/A                        | 0.073        | 0.014           | 5.43 (2.44,<br>12.07) | $3.32 \times 10^{-6}$ | CADPS            |
| rs4854769  | 3   | 135153081 | C/A                        | 0.385        | 0.196           | 2.58 (1.70,<br>3.90)  | $3.92 \times 10^{-6}$ | SLCO2A1          |
| rs2684796  | 15  | 97300915  | A/G                        | 0.250        | 0.104           | 2.88 (1.80,<br>4.60)  | $4.08 \times 10^{-6}$ | IGF1R            |
| rs4747211  | 10  | 73296229  | G/A                        | 0.208        | 0.079           | 3.06 (1.85,<br>5.05)  | $4.43 \times 10^{-6}$ | PSAP             |
| rs1490960  | 18  | 61961614  | C/A                        | 0.063        | 0.011           | 5.88 (2.49,<br>13.93) | $4.88 \times 10^{-6}$ | CDH7 &<br>CDH19  |
| rs7760101  | 6   | 166903864 | C/A                        | 0.073        | 0.015           | 5.28 (2.38,<br>11.74) | $5.00 \times 10^{-6}$ | RPS6KA2          |
| rs4951761  | 1   | 209760635 | A/G                        | 0.448        | 0.247           | 2.47 (1.65,<br>3.71)  | $6.62 \times 10^{-6}$ | RD3 &<br>SLC30A1 |
| rs2241493  | 15  | 29149644  | G/A                        | 0.365        | 0.186           | 2.52 (1.65,<br>3.84)  | $8.54 \times 10^{-6}$ | TRPM1            |
| rs1233755  | 20  | 15501506  | A/G                        | 0.063        | 0.012           | 5.61 (2.38,<br>13.27) | $9.47 \times 10^{-6}$ | MACROD2          |

**Supplementary table S6.** SNPs associated with TIH in cohort 1,  $P < 1.0 \times 10^{-5}$ . Only the sentinel SNP within each region is reported.

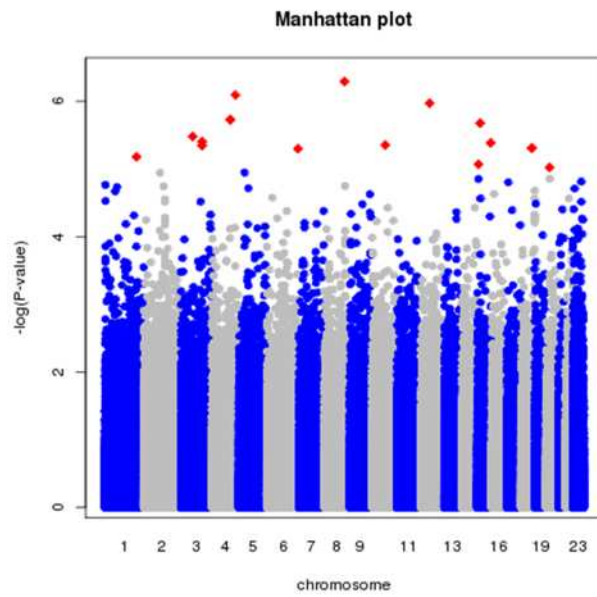

**Supplementary figure S3.** Manhattan Plot for GWAS of TIH; highlighted SNPs significant at  $P=1.0 \times 10^{-5}$  level

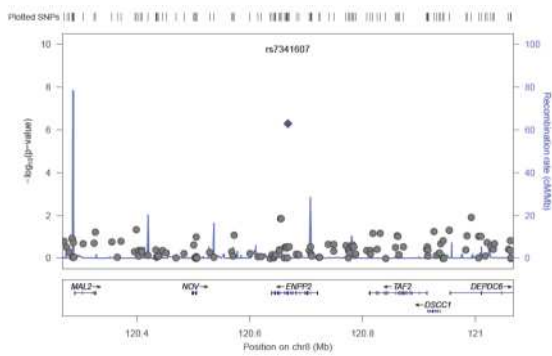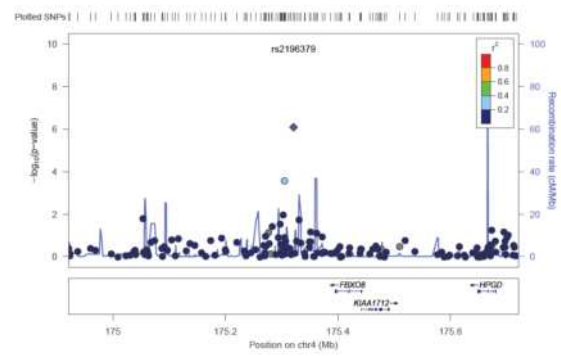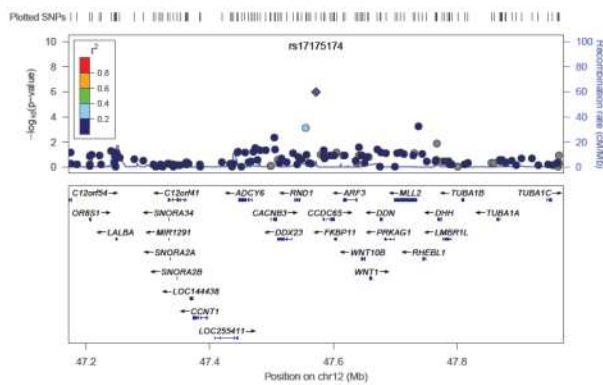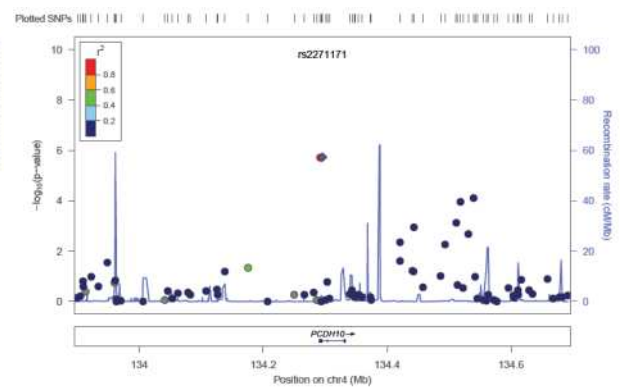

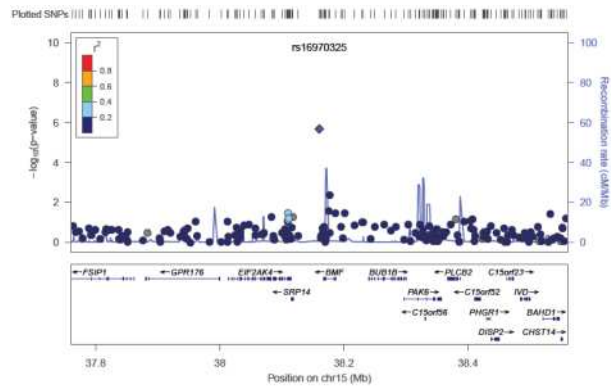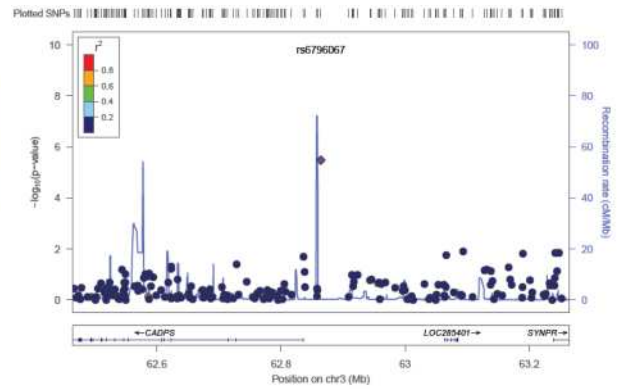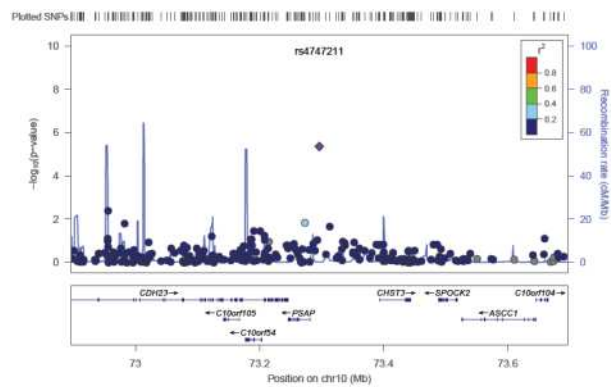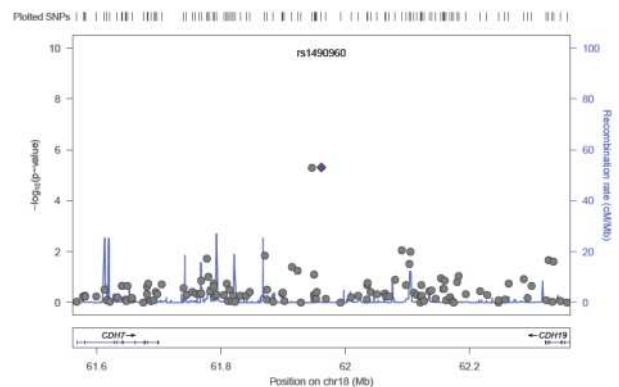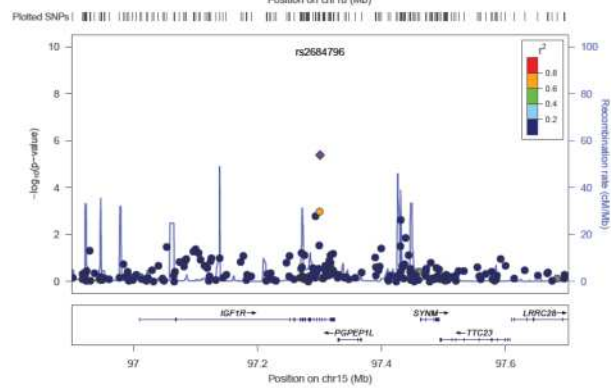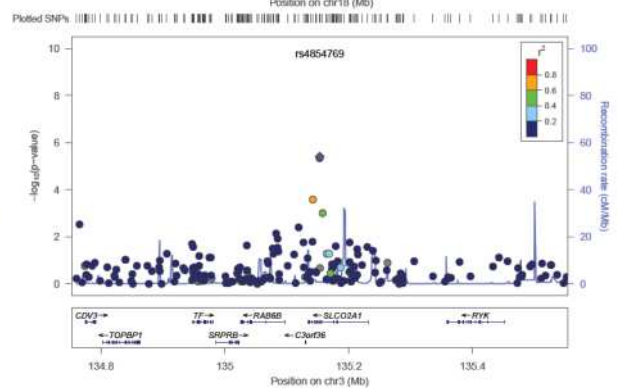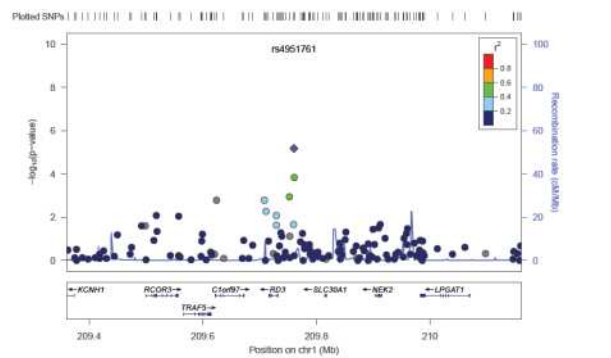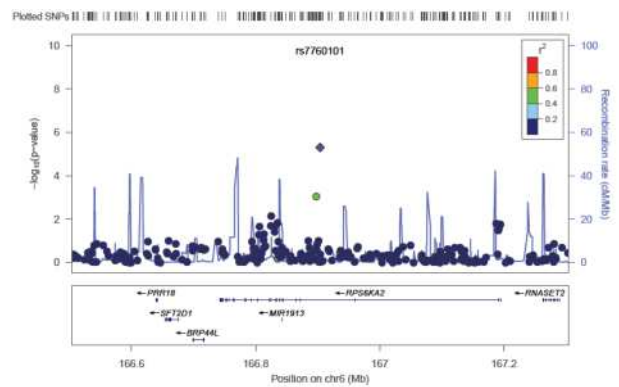

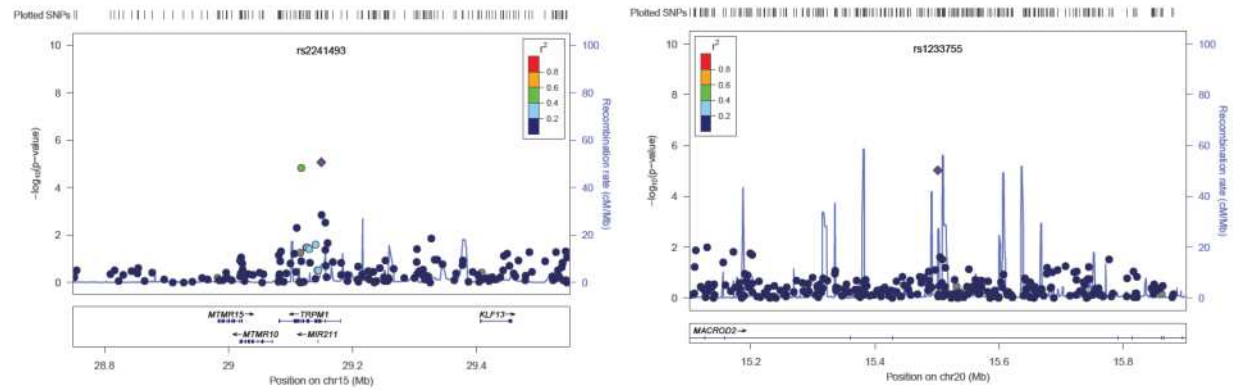

**Supplementary figure S4.** Region association plots of SNPs associated with cohort 1 hyponatremic TIH cases on thiazides at  $P=1.0 \times 10^{-5}$  level detailed in Table S10.

# Interrogation of GWAS candidate regions

| POS            | Variant details |     |      |          |         |                 |                 | Number of alleles |      |      |      | Number of individuals |      |      |      |      |      | Additive |      |
|----------------|-----------------|-----|------|----------|---------|-----------------|-----------------|-------------------|------|------|------|-----------------------|------|------|------|------|------|----------|------|
|                | REF             | ALT | MAF  | HWE      | GENE    | TRANSCRIPT      | CONSEQUENCE     | MINA              | MINU | OBSA | OBSU | REFA                  | HETA | HOMA | REFU | HETU | HOMU | P        | OR   |
| chr3:133666209 | C               | T   | 0.34 | 0.03     | SLCO2A1 | ENST00000310926 | MISSENSE A396T  | 34                | 15   | 48   | 53   | 22                    | 18   | 8    | 40   | 11   | 2    | 5.18E-04 | 3.33 |
| chr15:31362352 | C               | T   | 0.73 | 0.80     | TRPM1   | ENST00000542188 | MISSENSE S71N   | 33                | 22   | 48   | 53   | 5                     | 23   | 20   | 3    | 16   | 34   | 0.04     | 0.50 |
| chr18:64211251 | C               | T   | 0.19 | 1.00     | CDH19   | ENST00000262150 | MISSENSE V391M  | 13                | 26   | 48   | 53   | 35                    | 13   | 0    | 31   | 18   | 4    | 0.05     | 0.48 |
| chr20:15967390 | C               | T   | 0.20 | 0.55     | MACROD2 | ENST00000310348 | MISSENSE T335M  | 14                | 27   | 48   | 53   | 36                    | 10   | 2    | 29   | 21   | 3    | 0.08     | 0.50 |
| chr20:14066276 | C               | T   | 0.17 | 1.00     | MACROD2 | ENST00000310348 | MISSENSE T58I   | 20                | 13   | 47   | 53   | 29                    | 16   | 2    | 40   | 13   | 0    | 0.13     | 1.93 |
| chr15:31369123 | A               | G   | 0.74 | 0.20     | TRPM1   | ENST00000542188 | MISSENSE M40T   | 30                | 23   | 48   | 53   | 1                     | 28   | 19   | 3    | 17   | 33   | 0.15     | 0.61 |
| chr15:31295151 | T               | G   | 0.07 | 1.00     | TRPM1   | ENST00000542188 | MISSENSE N1268T | 4                 | 10   | 48   | 53   | 44                    | 4    | 0    | 43   | 10   | 0    | 0.17     | 0.42 |
| chr15:31294702 | G               | T   | 0.04 | 0.17     | TRPM1   | ENST00000542188 | MISSENSE P1418T | 2                 | 7    | 48   | 53   | 46                    | 2    | 0    | 47   | 5    | 1    | 0.17     | 0.30 |
| chr4:134071945 | G               | A   | 0.05 | 1.00     | PCDH10  | ENST00000264360 | MISSENSE G217E  | 3                 | 8    | 48   | 53   | 45                    | 3    | 0    | 45   | 8    | 0    | 0.22     | 0.40 |
| chr2:225362478 | C               | T   | 0.12 | 0.35     | CUL3    | ENST00000264414 | MISSENSE V567I  | 10                | 15   | 48   | 53   | 38                    | 10   | 0    | 38   | 15   | 0    | 0.52     | 0.71 |
| chr12:49308284 | A               | G   | 0.33 | 0.65     | CCDC65  | ENST00000266984 | MISSENSE H133R  | 29                | 37   | 48   | 53   | 25                    | 17   | 6    | 22   | 25   | 6    | 0.55     | 0.81 |
| chr12:49314994 | A               | G   | 0.33 | 0.65     | CCDC65  | ENST00000266984 | MISSENSE Y408C  | 29                | 37   | 48   | 53   | 25                    | 17   | 6    | 22   | 25   | 6    | 0.55     | 0.81 |
| chr4:134071921 | G               | A   | 0.08 | 1.00     | PCDH10  | ENST00000264360 | MISSENSE G209E  | 9                 | 7    | 48   | 53   | 39                    | 9    | 0    | 46   | 7    | 0    | 0.60     | 1.46 |
| chr18:63530016 | A               | G   | 0.73 | 0.44     | CDH7    | ENST00000323011 | MISSENSE N576S  | 24                | 30   | 48   | 53   | 4                     | 16   | 28   | 5    | 20   | 28   | 0.64     | 1.18 |
| chr4:134071920 | G               | A   | 0.03 | 1.00     | PCDH10  | ENST00000264360 | MISSENSE G209R  | 4                 | 3    | 48   | 53   | 44                    | 4    | 0    | 50   | 3    | 0    | 0.71     | 1.49 |
| chr12:51868968 | C               | G   | 0.79 | 0.01     | SLC4A8  | ENST00000453097 | MISSENSE T717R  | 19                | 24   | 48   | 53   | 0                     | 19   | 29   | 0    | 24   | 29   | 0.73     | 1.19 |
| chr12:49310787 | C               | A   | 0.04 | 1.00     | CCDC65  | ENST00000266984 | MISSENSE H169N  | 5                 | 4    | 48   | 53   | 43                    | 5    | 0    | 49   | 4    | 0    | 0.74     | 1.40 |
| chr12:49312540 | C               | T   | 0.04 | 1.00     | CCDC65  | ENST00000266984 | MISSENSE R294C  | 5                 | 4    | 48   | 53   | 43                    | 5    | 0    | 49   | 4    | 0    | 0.74     | 1.40 |
| chr15:31294343 | A               | T   | 0.05 | 1.00     | TRPM1   | ENST00000542188 | MISSENSE H1537Q | 4                 | 6    | 48   | 53   | 44                    | 4    | 0    | 47   | 6    | 0    | 0.75     | 0.72 |
| chr15:31294714 | C               | A   | 0.05 | 1.00     | TRPM1   | ENST00000542188 | NONSENSE E1414* | 4                 | 6    | 48   | 53   | 44                    | 4    | 0    | 47   | 6    | 0    | 0.75     | 0.72 |
| chr4:134071923 | G               | A   | 0.06 | 1.00     | PCDH10  | ENST00000264360 | MISSENSE G210R  | 7                 | 6    | 48   | 53   | 41                    | 7    | 0    | 47   | 6    | 0    | 0.78     | 1.31 |
| chr3:62459846  | A               | T   | 0.45 | 1.68E-14 | CADPS   | ENST00000383710 | SPLICE DONOR    | 42                | 47   | 46   | 53   | 5                     | 40   | 1    | 7    | 45   | 1    | 0.89     | 1.05 |
| chr8:120596022 | GA              | G   | 0.97 | 1.00     | ENPP2   | ENST00000259486 | FRAMESHIFT      | 3                 | 4    | 48   | 53   | 0                     | 3    | 45   | 0    | 4    | 49   | 1.00     | 1.22 |
| chr15:31334362 | C               | T   | 0.03 | 1.00     | TRPM1   | ENST00000542188 | MISSENSE V644M  | 3                 | 4    | 48   | 53   | 45                    | 3    | 0    | 49   | 4    | 0    | 1.00     | 0.82 |
| chr15:31294654 | C               | T   | 0.04 | 1.00     | TRPM1   | ENST00000542188 | MISSENSE V1434I | 4                 | 5    | 48   | 53   | 44                    | 4    | 0    | 48   | 5    | 0    | 1.00     | 0.88 |
| chr6:167271716 | T               | C   | 0.83 | 0.73     | RPS6KA2 | ENST00000510118 | MISSENSE E32G   | 16                | 18   | 48   | 53   | 0                     | 16   | 32   | 2    | 14   | 37   | 1.00     | 1.02 |
| chr1:211751948 | A               | C   | 0.57 | 4.98E-08 | SLC30A1 | ENST00000367001 | MISSENSE C3G    | 41                | 45   | 48   | 53   | 4                     | 33   | 11   | 1    | 43   | 9    | 1.00     | 0.99 |
| chr4:175223209 | G               | T   | 0.50 | 7.03E-30 | CEP44   | ENST00000426172 | MISSENSE A37S   | 48                | 53   | 48   | 53   | 0                     | 48   | 0    | 0    | 53   | 0    | 1.00     | 1.00 |
| chr5:136969744 | T               | G   | 0.50 | 7.03E-30 | KLHL3   | ENST00000309755 | MISSENSE T478P  | 48                | 53   | 48   | 53   | 0                     | 48   | 0    | 0    | 53   | 0    | 1.00     | 1.00 |
| chr15:31323206 | A               | C   | 0.50 | 7.03E-30 | TRPM1   | ENST00000542188 | MISSENSE V1053G | 48                | 53   | 48   | 53   | 0                     | 48   | 0    | 0    | 53   | 0    | 1.00     | 1.00 |

**Supplementary table S7.** One variant within SLCO2A1 is associated with the TIH trait in cohort 1 at a Bonferroni-corrected threshold of  $P < 0.0017$

(C>T Chr3:133666209 (rs34550074) encoding p.A396T). In order to fine-map loci identified by GWAS, individual variants in the nearest gene to the peak SNP that were observed at least 7 times in the combined cohort of cohort 1 cases and controls (sufficient observations to achieve a Fisher test nominal p-value of  $< 0.005$  if all alleles present in cases, and none in controls) were tested for association with the trait using PlinkSeq.

Abbreviations: REF = reference allele, CONMETA = vcf annotations, ALT = alternate allele, MAF = minor allele frequency, HWE = Hardy-Weinberg equilibrium, MIN = minor allele, OBS = total observed, REF = homozygous reference, HET = heterozygous alternate allele, HOM = homozygous alternate allele; A = affected; U = unaffected, P/OR are p-value & odds ratio under an additive model. PDOM, ORDOM, PREC, ORREC are p-values and odds ratios under dominant and recessive models

| Ensembl Gene ID | Ensembl Transcript ID | POS                       | NVAR | P       | I       | DESC                                               |
|-----------------|-----------------------|---------------------------|------|---------|---------|----------------------------------------------------|
| ENSG00000174640 | ENST00000310926       | chr3:133661459..133748570 | 5    | 1.9E-03 | 1.4E-04 | 0/1(2);1/0(1);1/1(1);34/15(1)                      |
| ENSG00000134160 | ENST00000542188       | chr15:31294159..31369123  | 18   | 0.02    | 1.8E-03 | 0/0(1);0/1(2);1/0(2);1/2(1);2/0(1);2/7(1);3/4(1)   |
| ENSG00000172264 | ENST00000310348       | chr20:14066276..15967795  | 4    | 0.05    | 4.1E-03 | 0/0(1);1/1(1);14/27(1);20/13(1)                    |
| ENSG00000071991 | ENST00000262150       | chr18:64172434..64218391  | 5    | 0.09    | 0.01    | 0/0(2);1/0(1);1/5(1);13/26(1)                      |
| ENSG00000197746 | ENST00000394934       | chr10:73587913..73588653  | 2    | 0.29    | 0.49    | 0/0(1);1/0(1)                                      |
| ENSG00000050438 | ENST00000453097       | chr12:51856173..51868968  | 2    | 0.37    | 0.04    | 0/2(1);19/24(1)                                    |
| ENSG00000164117 | ENST00000393674       | chr4:175180938..175180938 | 1    | 0.38    | 0.65    | 1/0(1)                                             |
| ENSG00000139537 | ENST00000266984       | chr12:49308284..49315200  | 6    | 0.43    | 0.05    | 0/2(1);0/3(1);29/37(2);5/4(2)                      |
| ENSG00000036257 | ENST00000264414       | chr2:225346702..225449659 | 5    | 0.58    | 0.27    | 0/0(2);0/1(1);1/0(1);10/15(1)                      |
| ENSG00000146021 | ENST00000309755       | chr5:136964078..137034083 | 5    | 0.67    | 0.50    | 0/0(3);0/1(1);48/53(1)                             |
| ENSG00000081138 | ENST00000323011       | chr18:63476982..63530016  | 2    | 0.71    | 0.17    | 0/1(1);24/30(1)                                    |
| ENSG00000140443 | ENST00000268035       | chr15:99250943..99454613  | 3    | 0.76    | 0.04    | 0/0(1);1/0(1);1/1(1)                               |
| ENSG00000138650 | ENST00000264360       | chr4:134071920..134073706 | 7    | 0.83    | 0.05    | 0/1(1);12/14(1);3/3(1);3/8(1);4/3(1);7/6(1);9/7(1) |
| ENSG00000136960 | ENST00000259486       | chr8:120569823..120638927 | 4    | 0.83    | 0.20    | 0/0(1);0/1(1);1/3(1);3/4(1)                        |
| ENSG00000249141 | ENST00000507747       | chr6:167271711..167271716 | 2    | 0.90    | 0.03    | 0/1(1);16/18(1)                                    |
| ENSG00000170385 | ENST00000367001       | chr1:211751948..211751948 | 1    | 1.00    | 0.25    | 41/45(1)                                           |
| ENSG00000198570 | ENST00000367002       | chr1:211652382..211654619 | 2    | 1.00    | 0.20    | 1/2(1);2/3(1)                                      |
| ENSG00000163618 | ENST00000383710       | chr3:62459846..62503834   | 2    | 1.00    | 0.13    | 1/1(1);42/47(1)                                    |
| ENSG00000171791 | ENST00000398117       | chr18:60985773..60985773  | 1    | 1.00    | 0.00    | 0/0(1)                                             |
| ENSG00000164118 | ENST00000426172       | chr4:175223209..175229888 | 4    | 1.00    | 0.80    | 0/0(2);0/1(1);48/53(1)                             |
| ENSG00000071242 | ENST00000510118       | chr6:166831772..167271716 | 7    | 1.00    | 0.06    | 0/0(2);0/1(3);1/1(1);16/18(1)                      |

**Supplementary table S8.** Burden testing for genes close to GWAS peaks were assessed for association with TIH, using the C-alpha test to assess whether common and rare variation in combination might be associated with affectation. No significant signals were detected.

Abbreviations: POS=position; NVAR=number of distinct variants; P=nominal p-value; I=an indicator of power, representing the minimum p-value theoretically; obtainable given the observed number of variants & alleles; DESC=a description of the distribution of alleles in affected vs unaffected for each distinct variant site.

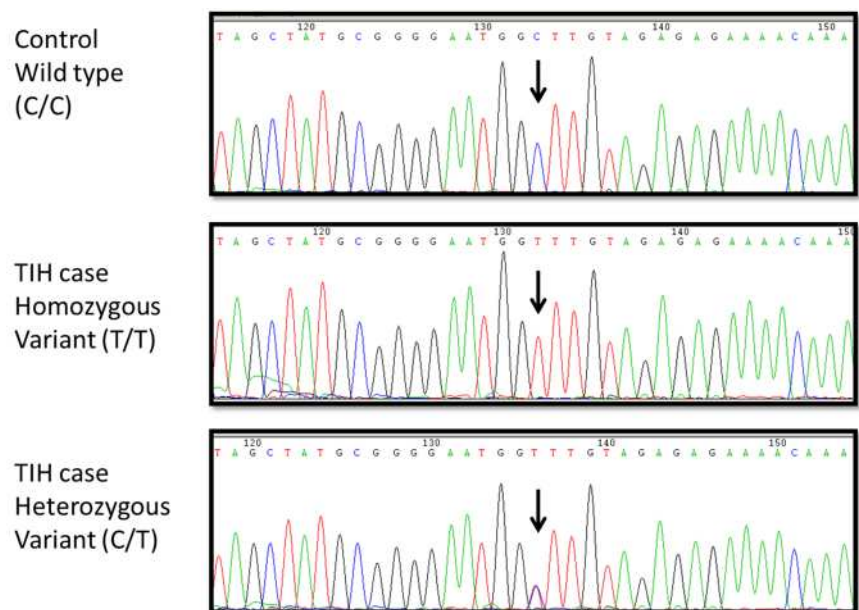

**Supplementary figure S5.** Sanger sequencing chromatograms of the region containing rs34550074 in hyponatremic TIH cases on thiazides and normonatremic thiazide controls. Wild type (C/C), homozygous variant (T/T) and heterozygous variant (C/T) and shown as indicated by the arrows.

*Replication of rs34550074 (p.A396T) in cohort 2 TIH cases and controls*

|            | Cohort 1 (48 cases vs 53 controls) |               |                    |                       | Cohort 2 (94 cases vs 106 controls) |               |                    |         | Cohort 1+2 Combined |                       |
|------------|------------------------------------|---------------|--------------------|-----------------------|-------------------------------------|---------------|--------------------|---------|---------------------|-----------------------|
|            | MAF (MAC)                          |               | Association Result |                       | MAF (MAC)                           |               | Association Result |         | Association Result  |                       |
|            | Cases                              | Controls      | OR                 | P-value               | Cases                               | Controls      | OR                 | P-value | OR                  | P-value               |
| rs34550074 | 0.354<br>(34)                      | 0.142<br>(15) | 3.327              | 5.18x10 <sup>-4</sup> | 0.271<br>(51)                       | 0.179<br>(38) | 1.702              | 0.030   | 2.128               | 1.70x10 <sup>-4</sup> |

**Supplementary table 9.** Replication of rs34550074 (p.A396T) in cohort 2 TIH cases and controls. Combined Association result estimated using Cochran-Mantel-Haenszel meta-analysis.

*Species conservation of SLCO2A1 rs34550074 (A396T)*

|       |                                                    |
|-------|----------------------------------------------------|
| Human | AALGMLFGGILMKRFVFSLQ <b>A</b> IPRIATTIITISMILCVPLF |
| Mouse | AALGMLFGGILMKRFVFPLQ <b>T</b> IPRVAATIMTISIILCAPLF |
| Rat   | AALGMLFGGILMKRFVFPLQ <b>T</b> IPRVAATIITISMILCVPLF |

**Supplementary table 10.** Species conservation of SLCO2A1 rs34550074 (A396T). The SNP is highlighted in red. Source: UniProtKB/Swiss-Prot Q92959 <http://www.uniprot.org/uniprot/Q92959>

## Tissue expression of GWAS candidate genes from table S7 including SLCO2A1

| Gene    | adipose  | adrenal  | blood    | brain    | breast   | colon    | heart    | kidney   | liver    | lung     | lymph    | ovary    | prostate  | skeletal_muscle | testes   | thyroid  |
|---------|----------|----------|----------|----------|----------|----------|----------|----------|----------|----------|----------|----------|-----------|-----------------|----------|----------|
| CADPS   | 0.150724 | 0.339242 | 0.078164 | 66.3673  | 0.004136 | 2.42585  | 7.33205  | 0.578336 | 0        | 0.573661 | 1.59939  | 0.889472 | 2.10418   | 0.0431645       | 1.50779  | 0.058042 |
| CCDC65  | 0.537446 | 1.60173  | 8.91035  | 4.65269  | 1.13934  | 1.1086   | 0.172254 | 1.2771   | 0.256213 | 3.67274  | 3.33654  | 5.49608  | 0.486168  | 0.0434132       | 30.7287  | 0.987369 |
| CDH19   | 2.35985  | 0.823009 | 0        | 5.79261  | 0.047502 | 22.3591  | 9.68634  | 0.209746 | 1.30585  | 1.74554  | 3.42946  | 0.72678  | 4.48621   | 0.223165        | 1.43356  | 0.822529 |
| CDH7    | 0.015701 | 0.002082 | 0.011387 | 1.01757  | 0.013005 | 0        | 0        | 0        | 0        | 0        | 0        | 0.024952 | 0.247223  | 0               | 1.09445  | 0        |
| CEP44   | 4.73232  | 3.65926  | 3.35264  | 3.23476  | 4.42077  | 4.5575   | 3.16853  | 5.69168  | 1.85858  | 2.20978  | 5.53978  | 8.95892  | 7.20022   | 2.43424         | 7.59486  | 5.69071  |
| ENPP2   | 147.1997 | 59.70628 | 0.316836 | 211.4306 | 108.1703 | 117.427  | 6.01998  | 51.29446 | 11.563   | 69.79058 | 55.4035  | 21.67592 | 41.0275   | 6.70912         | 51.68351 | 5.91492  |
| FBXO8   | 8.62634  | 6.5906   | 8.65996  | 5.5443   | 11.7431  | 16.4944  | 12.3274  | 13.7236  | 13.8341  | 10.2798  | 9.79859  | 7.88778  | 18.0382   | 2.81952         | 11.6887  | 12.8725  |
| IGF1R   | 7.48965  | 4.93185  | 6.02384  | 5.2179   | 5.90901  | 8.67359  | 6.78246  | 9.19116  | 0.740085 | 9.32692  | 7.04927  | 8.64473  | 11.1917   | 5.1727          | 8.18034  | 19.4133  |
| MACROD2 | 0.618824 | 2.19421  | 2.07143  | 10.3037  | 1.79405  | 1.13752  | 0.59073  | 3.90292  | 1.09417  | 3.22744  | 0.835012 | 4.13086  | 2.80717   | 0.161879        | 4.96801  | 1.35992  |
| PCDH10  | 0.105645 | 0.488996 | 0        | 9.0669   | 0.004466 | 0.615067 | 0.139646 | 1.80548  | 0.0036   | 0.3593   | 0.567968 | 0.960036 | 3.11455   | 0.09102         | 3.26661  | 0.246871 |
| PSAP    | 416.347  | 285.291  | 1408.64  | 389.503  | 460.875  | 305.745  | 375.978  | 327.799  | 211.455  | 430.646  | 281.58   | 345.625  | 339.76    | 347.625         | 292.189  | 445.431  |
| RD3     | 0.005814 | 0.044135 | 0        | 0.002091 | 0        | 0.12957  | 0.025868 | 0.025605 | 0.048434 | 0.028833 | 0.112073 | 0.01703  | 0.0256226 | 0               | 0.019827 | 0        |
| RND1    | 0.318705 | 1.3556   | 0.336718 | 15.8227  | 1.94083  | 1.07612  | 0.030979 | 1.00055  | 8.11731  | 51.2061  | 3.70293  | 0.484561 | 1.81087   | 0               | 1.29479  | 0.839912 |
| RPS6KA2 | 29.3585  | 12.9838  | 0.760006 | 15.3732  | 7.13159  | 13.9952  | 21.7918  | 8.97543  | 3.53918  | 15.7524  | 11.4227  | 9.75361  | 11.1919   | 5.81856         | 4.28756  | 15.4989  |
| SLC30A1 | 13.809   | 6.94114  | 17.2959  | 10.5707  | 11.2757  | 7.94114  | 4.27437  | 17.4074  | 39.7654  | 9.9257   | 7.31628  | 17.3002  | 8.65655   | 1.72386         | 13.8156  | 12.8486  |
| SLCO2A1 | 9.5118   | 32.2811  | 0.067335 | 0.70289  | 3.1506   | 7.09463  | 5.07971  | 34.2554  | 1.38133  | 47.3888  | 8.47464  | 4.20927  | 14.1765   | 1.69366         | 3.40402  | 15.3912  |
| TRPM1   | 0.039056 | 0.026716 | 0        | 0.019275 | 0.018892 | 0.045238 | 0        | 0.017986 | 0        | 0        | 0        | 0.050933 | 0         | 0               | 1.37085  | 0        |

**Supplementary table 11.** Tissue expression of the GWAS candidate genes from table S7. SLCO2A1 is principally expressed in the kidneys, adrenal glands and lungs. Tissue-specific gene expression data based on Human BodyMap 2.0 - <http://www.cureffi.org/2013/07/11/tissue-specific-gene-expression-data-based-on-human-bodymap-2-0/>. Units given are Fragments Per Kilobase of exon per Million reads (FPKM), a measure of gene expression normalized to gene size and RNA-seq library size.

## Human kidney immunofluorescence – PGT kidney expression

### A - GLOMERULUS (CORTEX)

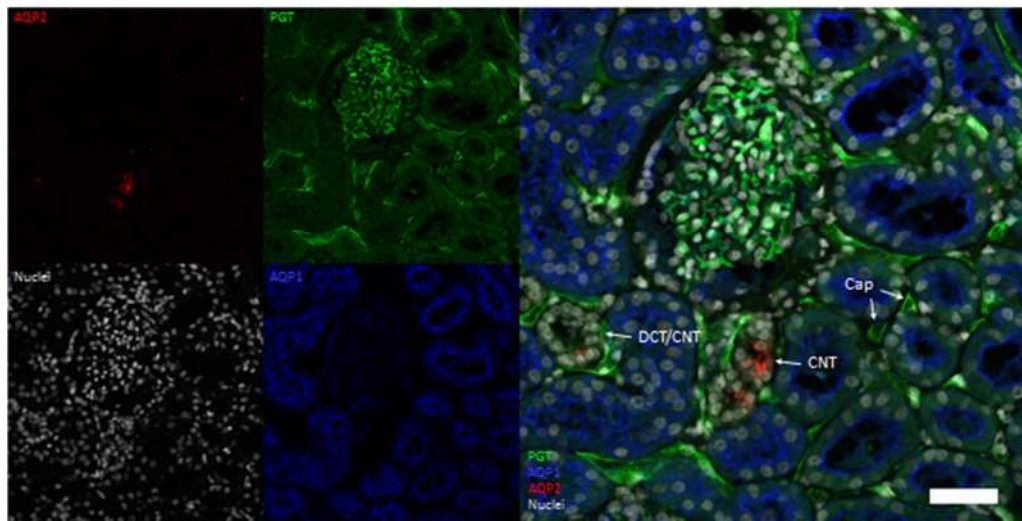

### B - CORTEX

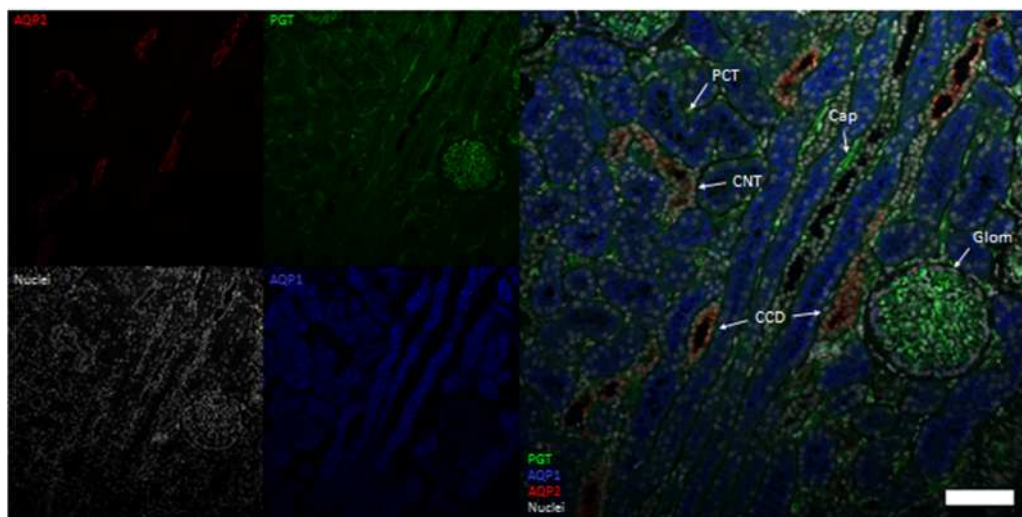

C - CORTEX

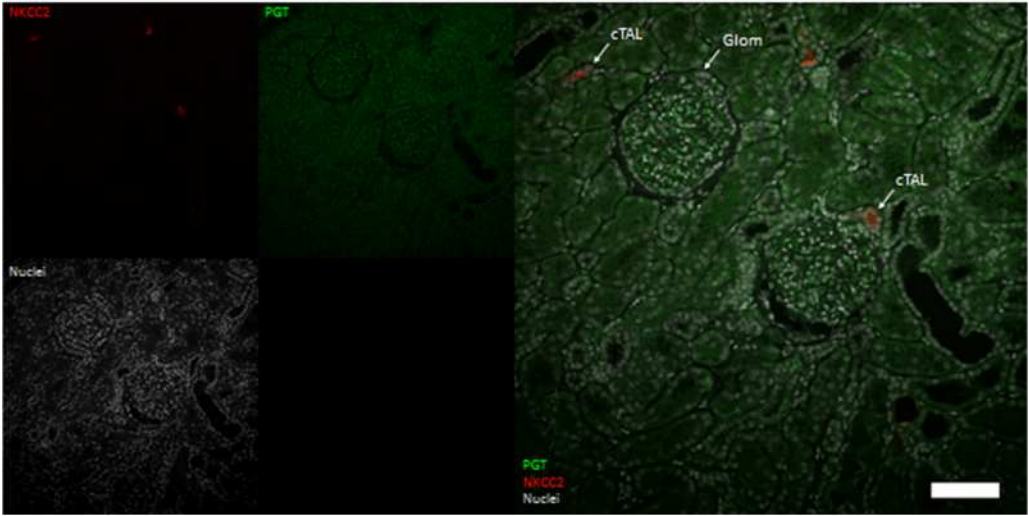

D - CORTEX

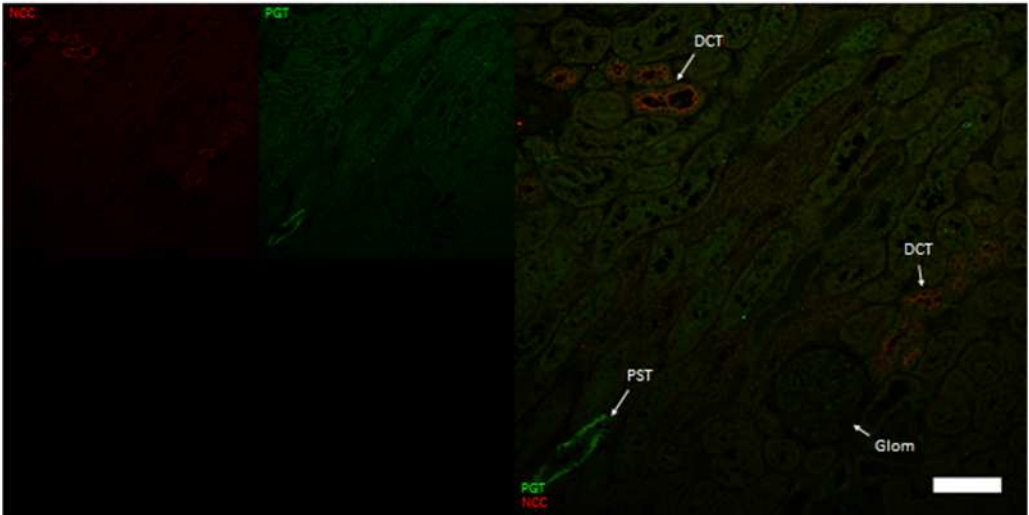

E - CORTEX / OUTER STRIPE OUTER MEDULLA

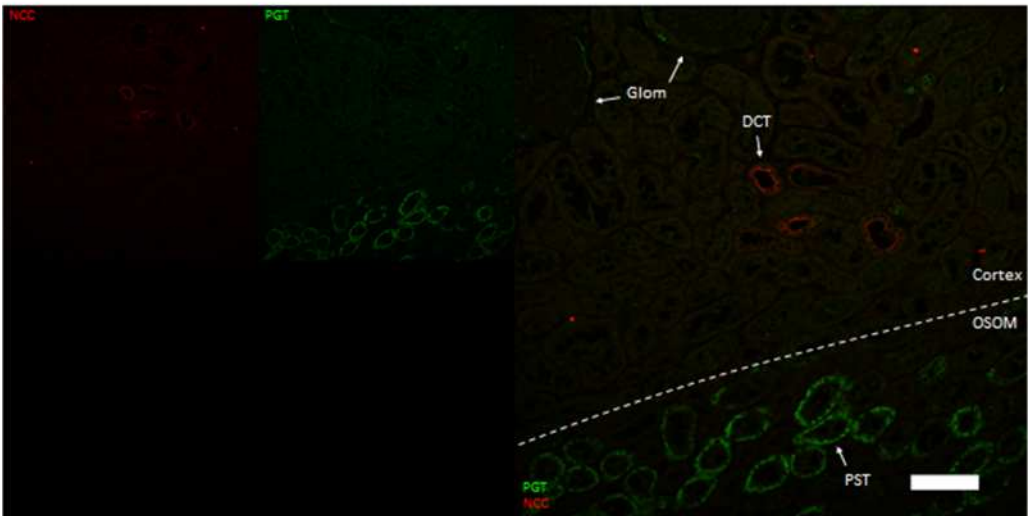

# F - OUTER STRIPE OUTER MEDULLA

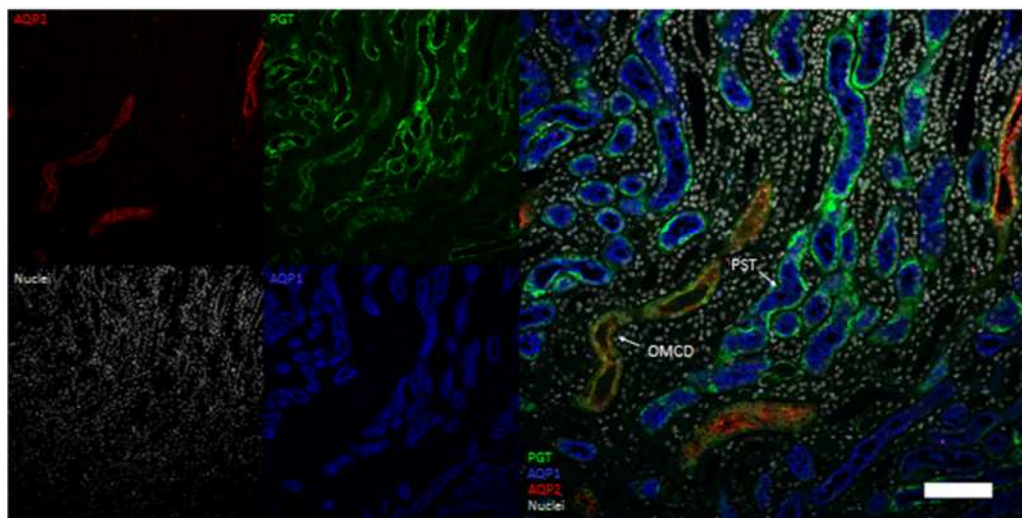

# G - OUTER STRIPE OUTER MEDULLA

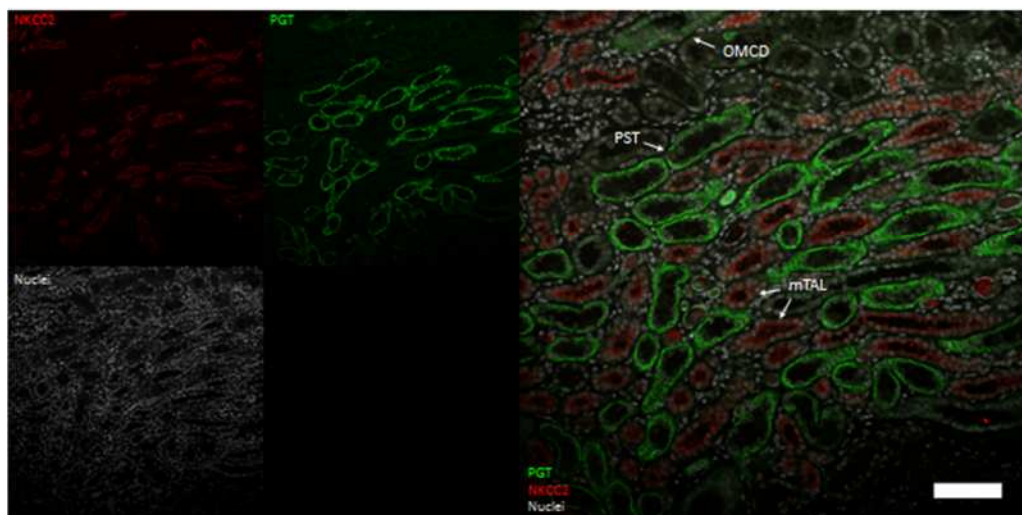

# H - INNER STRIPE OUTER MEDULLA

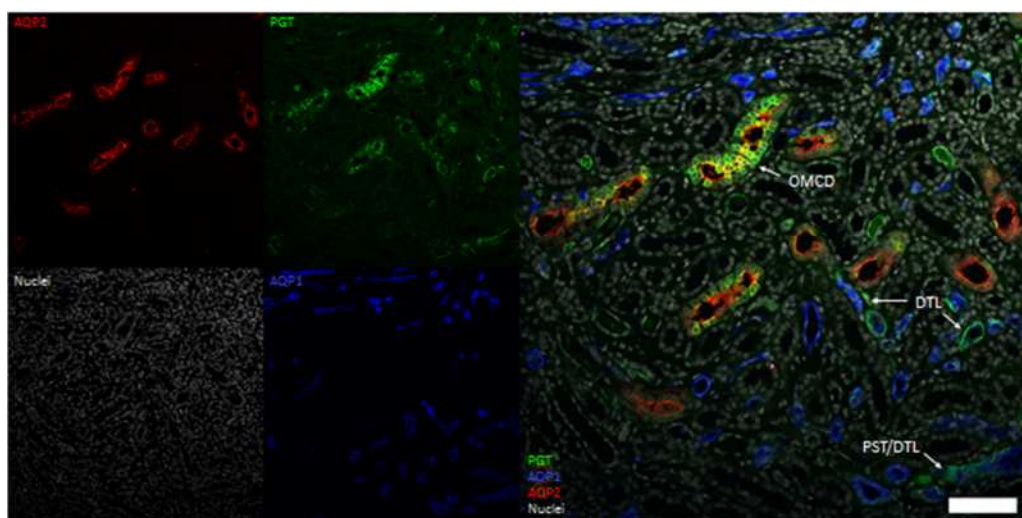

I - INNER STRIPE OUTER MEDULLA

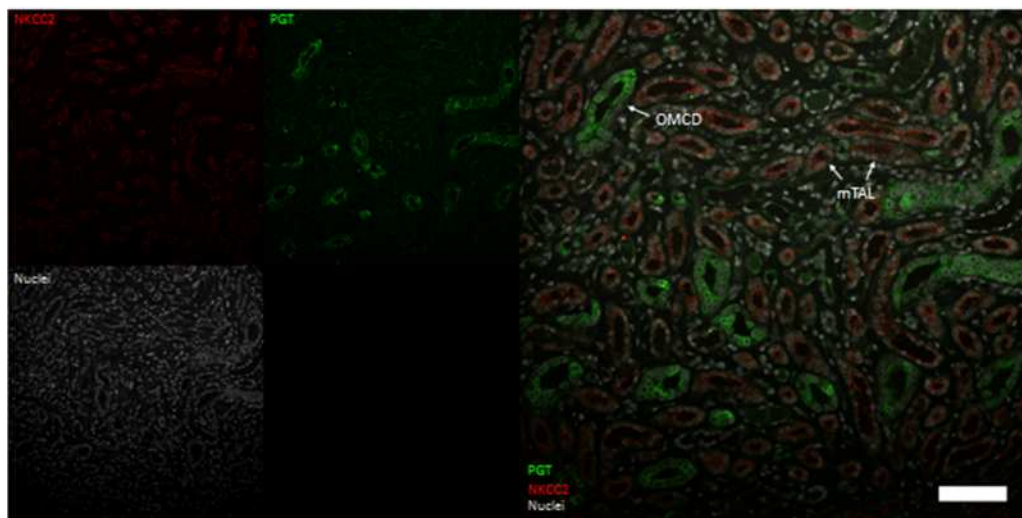

J - INNER STRIPE OUTER MEDULLA / INNER MEDULLA

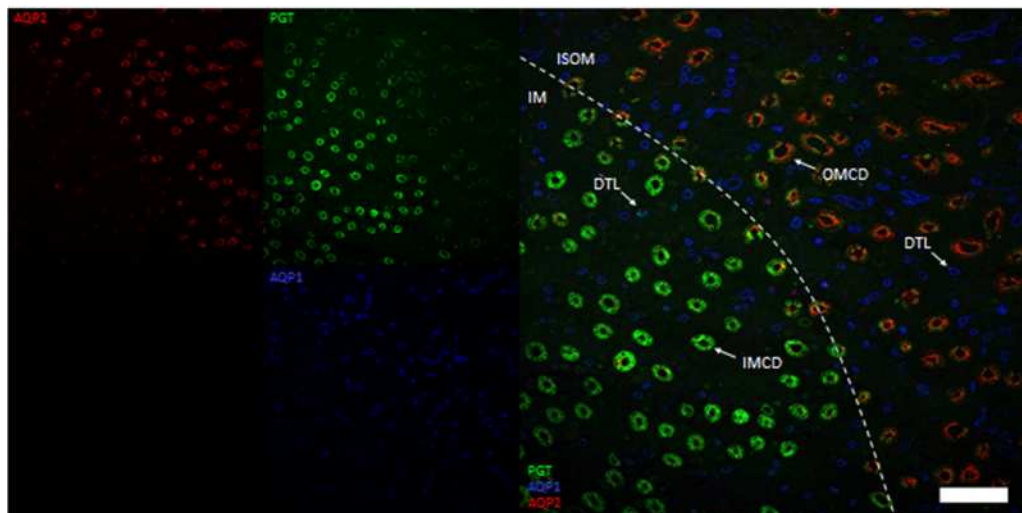

K - INNER STRIPE OUTER MEDULLA / INNER MEDULLA

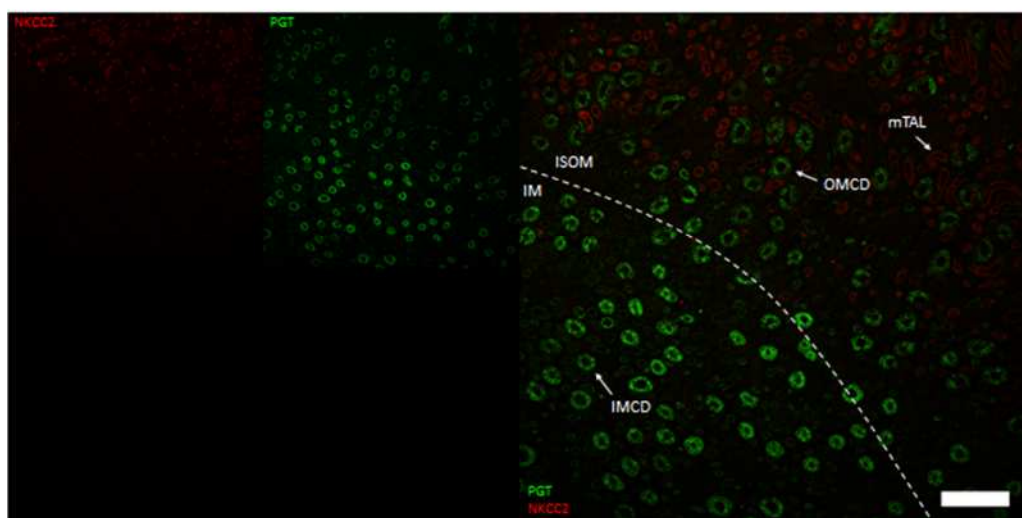

#### L - INNER MEDULLA

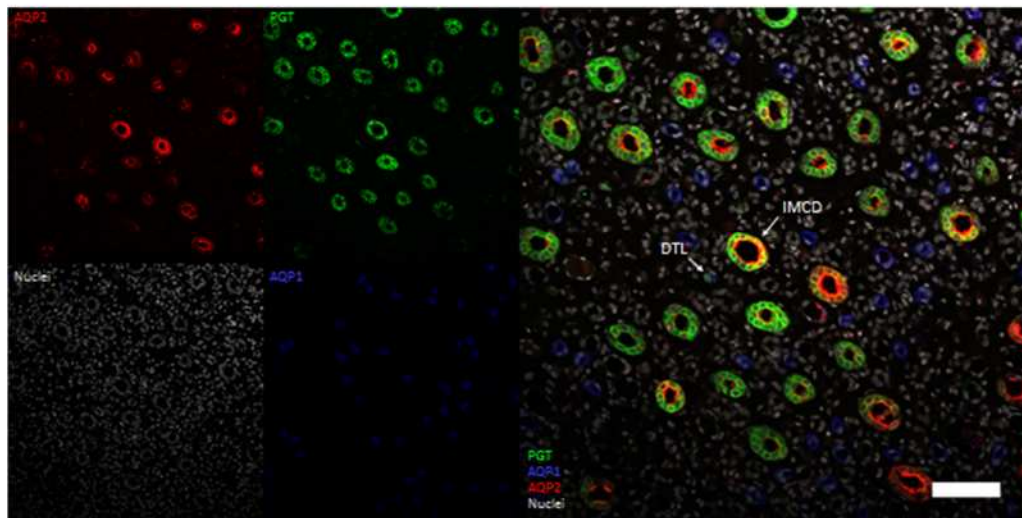

#### M - THIN LIMBS OF LOOP OF HENLE (INNER MEDULLA)

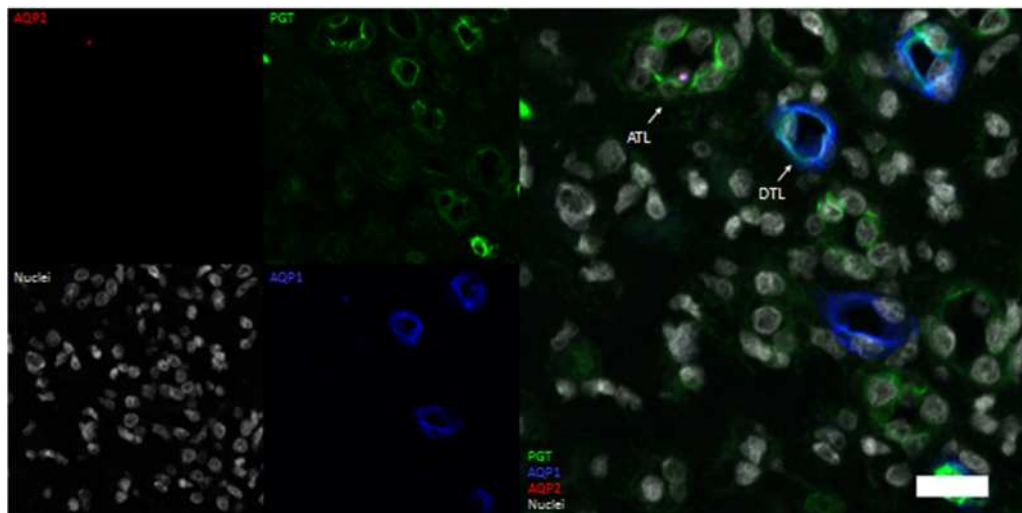

**Supplemental figure 6.** Representative pseudocolored average intensity z projections of immunofluorescent stained kidney sections showing the distribution of prostaglandin transporters (PGT). PGT was colocalised with the following markers: aquaporin-1 (AQP1) to identify the proximal convoluted tubule (PCT), proximal straight tubule (PST) and descending thin limb loop of Henle (DTL); aquaporin-2 (AQP2) to identify the connecting tubule (CNT) and collecting duct segments - cortical (CCD), outer medullary (OMCD) and inner medullary (IMCD); Na-Cl Co-transporter (NCC) to identify the distal convoluted tubule (DCT); NKCC2 to identify the thick ascending limb loop of Henle segments – cortical (cTAL) and medullary (mTAL). (A – D) Cortex staining showing PGT staining in the glomerulus (Glom) and capillary (Cap), (E) Junction of cortex and outer stripe of the outer medulla

(OSOM), (F – G) OSOM staining, (H – I) Staining of the inner stripe of the outer medulla (ISOM), (J – K) Staining at the interface of the ISOM and inner medulla (IM), (L) IMCD staining in the IM, (M) Higher laser/detector setting digitally zoomed image of the IM AQP1-positive DTL and AQP1-negative ascending thin limb loop of Henle (ATL). Scale Bars: (A) 50  $\mu\text{m}$ ; (B – I, L) 100  $\mu\text{m}$ ; (J – K) 200  $\mu\text{m}$ ; (M) 25  $\mu\text{m}$ . This figure contains images also shown in figure 3.

#### *Urinary PGE<sub>2</sub> and PGE<sub>2</sub> Metabolite (PGE<sub>2</sub>M) concentration*

Supplementary Figure S10 shows urinary PGE<sub>2</sub> and PGE<sub>2</sub>M concentrations in cohort 2 patients.

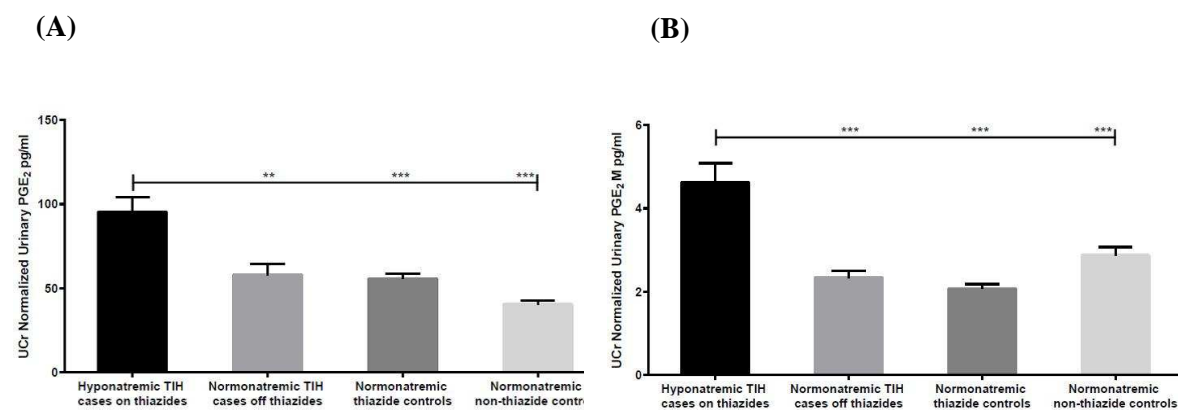

**Supplementary figure S7.** Urinary prostaglandin concentration in 24 hour urine samples from cohort 2 TIH cases and controls. (A) Prostaglandin E<sub>2</sub> (PGE<sub>2</sub>) concentration and (B) PGE<sub>2</sub> Metabolite (PGE<sub>2</sub>M) concentration. TIH cases n=47, normonatremic thiazide controls n=96, normonatremic non-thiazide controls n=52. Determined by 1 way ANOVA with Bonferroni correction. Data represented as mean  $\pm$  SEM. \*p < 0.05, \*\*p < 0.01, \*\*\*p < 0.001. Ucr – Urinary Creatinine. Ctrl – Control.
